# Supplementary material for: Exploring Atmospheric Nitrate Formation Mechanisms during the Winters of 2013 and 2018 in the North China Region via Modeling and Isotopic Analysis
Source: Copernicus journal article supplement (doi:10.5194/egusphere-2024-3044), 2024-10-30
Supplement: Supplementary file [file egusphere-2024-3044-AC3-supplement.pdf]

**Responses to reviewers (original comments by reviewers are in blue).**

**Reviewer #1:**

Comments on Liu et al., 2024

General summary:

Overall, I think there is clear evidence that a lot of work has been done and much data produced. The writing is clear. The technical analysis seems logical and results reported well, although I cannot speak much to the actual modelling technical components as that is outside my expertise.

My primary critique revolves around the structure and narrative of the paper. Namely, there is so much information presented that it is sometimes difficult to keep track of what the overall main point is that the authors are trying to get across. I think this is exemplified in two ways: first, the title itself about “Exploring...mechanisms”, while accurate to the content, highlights that there is less focus on a definitive point/conclusion than just summarizing and overviewing a lot of results from modelling. Second, there is a massive Results section, but no Discussion. There is some discussion happening within the Results, but the paper would likely improve by having less space dedicated to describing every result from the modelling and more space on what those results mean for things like policy implications, the need to treat interior cities differently from coastal ones in regulations, etc. Overall, I would suggest that the authors take a fresh look at the content of the paper as a whole narrative and re-evaluate if everything in the results needs to be included and described at the detail it currently is at.

That said, I do think that there is a good information here, and a valuable contribution. And I have largely minor critiques on the technical side and scientific content. But for the authors’ sake, I think the paper’s eventual impact could be greatly improved by focusing the narrative, simplifying/summarizing some of the base results further, and speaking more to the broader implications of this work.

**Reply:** Thank you for your valuable suggestions for improvement. We agree that the current results section had been overly detailed, which may have detracted from the overall focus of the paper. In response to your feedback, we have implemented the following adjustments:

**1. Revised the Title**

In line with your suggestions, we had revised the title into: “Enhanced Atmospheric Oxidation and Particle Reductions Driving Changes to Nitrate Formation Mechanisms Across Coastal and Inland Regions of North China.”

**2. Streamlined the Results Section**

In Section 3.2, we removed some comparisons with previous literature to highlight the unique findings of this study. We streamlined the content by summarizing key trends in a more concise format, with a particular focus on the differences between inland and coastal regions. Additionally, we merged relevant figures, as shown in Figure 11.

**3. Enhanced the Discussion**

To enhance the discussion, we enriched the results section with additional commentary to emphasize the broader implications and scientific significance of our findings. In Section 3.4 (lines 413–489), we enhanced the discussion of model-isotope comparisons and their implications. Specifically, we proposed concrete policy recommendations, such as intensifying control measures targeting photochemical reactions in inland cities (lines 584–588). We proposed that coastal cities

should focus more on regulations related to aerosol surface area (lines 630–636).

Additionally, in Section 3.6, we conducted a comparative analysis of emission reduction experiments between Beijing and Qingdao, providing targeted strategies for improving air quality based on the unique characteristics of each city.

### **Major points:**

I cannot see a supplemental section on the Preprint review page? This made it impossible to examine things referenced in the methods. (Apologies if this was a mistake on my part).

Results: There is a huge amount of information and data both presented and discussed. While I commend the authors for being upfront with their data, it can be a bit overwhelming at times and causes some of the focus to be lost. I would recommend looking back over this section to determine what exactly are the main points and stories you are aiming to get across, and pare down any information and number discussion that distracts away from those points. Perhaps greater summarization of regional trends (e.g., inland vs. coastal) rather than relaying data from multiple cities would help focus the section, too. You do this already some by focusing on Beijing vs. Qingdao, but even further summarization/simplification could help in some spots.

There are a lot of figures, and many of them are similar in theme (e.g., comparing an atmospheric chemical in 2013 and in 2018 and their difference). Perhaps combining many of these into a single, larger figure would be more effective as the reader could cross compare more easily and not hit figure fatigue.

Data availability: This is an unacceptable statement for data availability, as per ACP standards. Data are to be hosted in a publicly accessible location. See further guidance from [https://www.atmospheric-chemistry-and-physics.net/policies/data\\_policy.html](https://www.atmospheric-chemistry-and-physics.net/policies/data_policy.html):

If the data are not publicly accessible at the time of final publication, the data statement should describe where and when they will appear, and provide information on how readers can obtain the data until then. Nevertheless, authors should make such embargoed data available to reviewers during the review process in order to foster reproducibility. The Copernicus review system allows to define such assets as 'access limited to reviewers' and reviewers must then sign that they will use such data only for the purpose of reviewing without making copies, sharing, or reusing.

In rare cases where the data cannot be deposited publicly (e.g., because of commercial constraints), a detailed explanation of why this is the case is required. The data needed to replicate figures in a paper should in any case be publicly available, either in a public database (strongly recommended), or in a supplement to the paper.

**Reply:** Thank you for your valuable feedback. In response, we have made the following revisions:

#### **1. Supplementary Materials**

We have submitted the supplementary materials as required and ensured that all relevant content is clearly labeled. It appears that, perhaps due to a system error, the reviewer may not have been able to access these materials. To resolve this issue, we have added the supplementary materials at the end of the document with all references clearly indicated. We will verify the completeness of these materials in our submission of revised version. We kindly invite you to review them and welcome any further comments

#### **2. Results Section Length**

Thank you for highlighting the issue of excessive detail in the results section. We have carefully

revised this section to eliminate repetitive descriptions of secondary information and city-specific data. Specifically, in Section 3.2, we have streamlined the content by summarizing key trends in a more concise format, particularly focusing on the differences between inland and coastal regions. In Section 3.4, we have added detailed comparisons and summaries of model simulations and isotope data for Beijing and Qingdao. Additionally, in Section 3.6, we have placed greater emphasis on the comparative analysis of emission reductions between Beijing and Qingdao, ensuring a clearer and more focused narrative.

### 3. Number of Charts

Your suggestion regarding the number of charts is greatly appreciated. To streamline the presentation and enhance data comparability, we have merged charts with similar themes. The chemical differences in air composition between 2013 and 2018, including the GR, HONO, N<sub>2</sub>O<sub>5</sub>, and NO<sub>x</sub> concentrations over the North China Plain during winter, have been merged into a single figure (Figure 11).

### 4. Data Availability Statement

Thank you for your valuable feedback. We recognize that the initial statement may have lacked sufficient detail. We have updated the data availability statement to provide more comprehensive information on how to access the data. All datasets supporting the findings of this study are available through the following channels. Primary datasets and analysis results are available from the corresponding authors upon reasonable request. All plotting data and essential research data have been deposited in a publicly accessible repository on the Baidu Cloud (Data link: <https://pan.baidu.com/s/153rcdB-vTidH-14PPaXu-A>; Access code: egus).

#### Specific points:

71: Is this coastal or inland Greenland?

**Reply:** Thank you for your question. The Greenland research station mentioned in the paper is located at (72.6°N, 38.5°W) within Greenland's polar environment, and it is geographically closer to the coastal regions.

73: What is it about the air mass origin that affects the nitrate formation? Or why is this being set apart and discussed here after the review of the coastal vs. inland cities? Isn't air mass origin also the primary reason for those differences? The structure of the paragraph is just confusing me a little bit here.

**Reply:** Thank you for the question. Regarding the influence of air mass origin on nitrate formation, we have addressed this issue separately in the paper because the source of the air mass is a crucial factor driving the differences between coastal and inland cities, that impacts the underlying mechanisms, specifically the effects of pollutant composition and humidity on nitrate formation pathways.

Specifically, marine air masses are typically associated with higher humidity, lower NO<sub>x</sub> mixing ratios, and longer NO<sub>3</sub> radical lifetimes, which significantly promote reactions via the hetN<sub>2</sub>O<sub>5</sub> pathway. In contrast, continental air masses usually exhibit higher NO<sub>x</sub> mixing ratios and NH<sub>3</sub> concentrations, which are more favorable for nitrate formation through the OH + NO<sub>2</sub> pathway. To better understand these regional differences, we have compared the nitrate formation mechanisms between coastal and inland cities and further investigated the influence of air mass origin in Section 3.5.3 (lines 608–611). This analysis provides a more comprehensive understanding of the underlying

driving mechanisms behind these regional disparities.

Fig. 2: Data source for terrain heights should be cited

**Reply:** Thank you for your suggestion. We have supplemented a citation for the terrain elevation data in the manuscript (lines 144–145). The data are sourced from the GEBCO Compilation Group (2024) GEBCO 2024 Grid (doi:10.5285/1c44ce99-0a0d-5f4f-e063-7086abc0ea0f).

165: Was there a specific data network that you were sourcing within that website? For example, that website is just a portal to access many different data networks, such as WMO and GHCN, and if you know the exact data source network, that could be cited here and be more clear.

**Reply:** We have clarified in the manuscript (line 146) that the terrain elevation data were obtained from the GEBCO website ([https://www.gebco.net/data\\_and\\_products/gridded\\_bathymetry\\_data/](https://www.gebco.net/data_and_products/gridded_bathymetry_data/)) which provides access to the GEBCO 2024 grid dataset.

168: A little more information about these 68 stations would be beneficial, such as are they all within a specific region/geographic bounds? Were there any selection criteria applied to choose the stations?

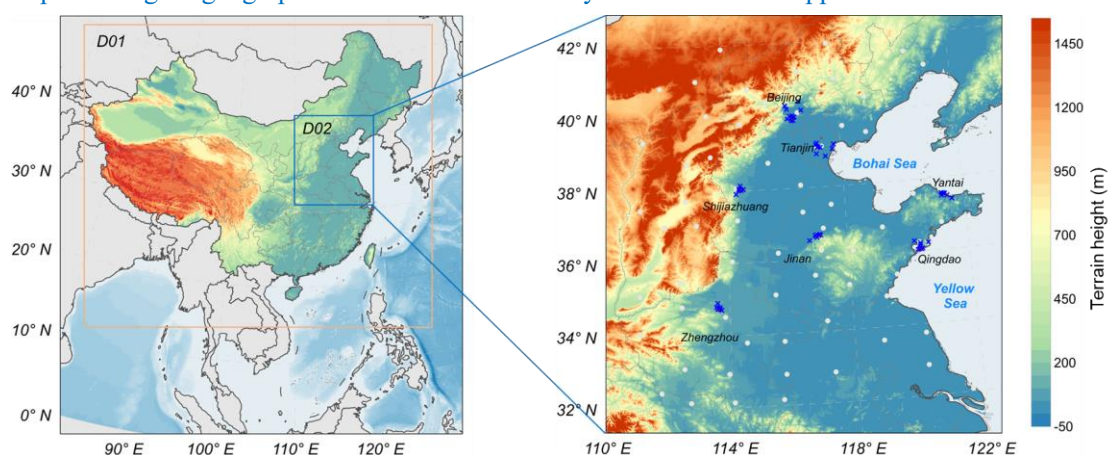

**Reply:** These 68 observation stations were all located within the simulated D02 domain, which corresponded to the North China region. The selection of these stations was based on the availability of observational data. Specifically, all stations within this area that had observational data were included.

185: Just to confirm, are all the instrumentation specifics the same that you used here as in this cited paper? You might add a brief line or addition to the end of the sentence currently ending in “denitrifier method” to add the instrumentation used, so that the reader doesn’t have to go look that basic information up in another paper.

**Reply:** Thank you for your valuable feedback. We now specify that the instrument used was the Gasbench-IRMS (Delta V, Thermo Scientific), which is the same as the one employed in our previous research. This clarification was added at the end of the sentence (lines 210–212) in the revised manuscript.

Revised sentence: The  $\delta^{18}\text{O}$  and  $\delta^{15}\text{N}$  values of  $\text{NO}_3^-$  in the TSP samples were determined via the bacterial denitrifier method (Casciotti et al., 2002; Sigman et al., 2001) with the Gasbench-IRMS system (Delta V model, Thermo Scientific).

204: I think that some more information needs to be given here on how you used these indicators to evaluate the simulation effect. You have cited some proposed benchmarks, but it isn't clear to me readily how you will be using this information in your paper. In a very soon following section (3.1) about model evaluation where you present simulated values and some of the benchmarks, I was able to eventually infer how you were doing the evaluation, but it should really be more explicitly clear in the methodology.

**Reply:** Thank you for your comment. We have included several evaluation metrics and benchmarks in the methodology section (Table 1 and Table 2); however, due to the extensive number of evaluation formulas, we have provided a comprehensive description of the calculation methods and formulas in the supporting information. You can find these details in Table S3 of the supporting information.

220: I'm unclear exactly how the numbers being discussed here from the 68 sites were gathered and compared. Are these pairwise calculations, or overall means, or involving some sort of spatial dimension, etc? Are the comparisons all at hourly resolution, or aggregated to daily or something else? There needs to be more clarity on this, likely in the methodology of the 2.5 section. Also, how did you evaluate parameters that lacked cited benchmarks (perhaps something else that could be included in the methodology)? For example, some of the Pearson correlation coefficients are somewhat low, for wind especially.

**Reply:** Thank you for your questions. For the data collected from the 68 observation stations, comparisons were conducted at on an hourly basis. At each station, the observed value was compared with the simulated value from the corresponding model grid cell on a point-by-point, and hour-by-hour basis. These paired comparisons were then aggregated across all 68 stations, and statistical evaluation metrics (e.g., MB, RMSE, and IOA) were generated from the entire dataset to provide an overall assessment of the model's performance.

To make these comparisons, we used the grid cell corresponding to the geographic coordinates of each observation point. This process ensured precise spatial and temporal alignment between the model simulation data and the observational data. Both data processing and comparisons were conducted on an hourly basis, without any daily averaging or other forms of temporal aggregation. Further details on this methodology can be found in Section 2.5 (lines 249–254) of the revised manuscript.

Model evaluation is both a critical and challenging part of model research. The current evaluation framework is based on findings from numerous studies. The relevant literature indicates that the current evaluation metrics are sufficient for analyzing model performance. We aim to further supplement and refine our model evaluation process through these calculations. Regarding the missing cited benchmarks, commonly used methods in the literature, such as those for wind speed and wind direction, were adopted, and we acknowledged that the observed underestimation is a common phenomenon in the model. For instance, the calculation of the Pearson correlation coefficient is intended to assist in assessing model performance. Although some parameters, particularly the correlation coefficient for wind speed, yield lower values, this phenomenon is consistent with the well-documented tendency of the WRF model to overestimate wind speed, which is an issue that is frequently reported in the literature (Tan et al., 2017; Jacobson and Kaufman, 2006). Moreover, evaluating wind direction data is complicated by its cyclic nature (since 360° and 0° represent the same direction), which may lead to some deviations in the correlation and error

metrics.

Tan, J., Zhang, Y., Ma, W., Yu, Q., Wang, Q., Fu, Q., Zhou, B., Chen, J., and Chen, L.: Evaluation and potential improvements of WRF/CMAQ in simulating multi-levels air pollution in megacity Shanghai, China, *Stochastic Environmental Research and Risk Assessment*, 31, 2513-2526, doi:10.1007/s00477-016-1342-3, 2017.

Jacobson, M. Z. and Kaufman, Y. J.: Wind reduction by aerosol particles, *Geophysical Research Letters*, 33, doi:10.1029/2006GL027838, 2006.

Section 3.4: The model has output for “Others” but your isotopic method doesn’t. However, I don’t see any discussion of this in this section, but I feel it needs addressed in some form. If 5-8% of reactions are “others” in the model, but you don’t distinguish those in the isotopic method, does that mean that you assume you are attributing those “others” reactions to either OH+NO<sub>2</sub> or hetN<sub>2</sub>O<sub>5</sub>? Is that baked into the uncertainties in any way, or handled specifically?

**Reply:**

Thank you for your valuable comments. We apologize for the lack of detailed information on our methods, which may have caused confusion.

The CMAQ model took a comprehensive approach by including the contributions of 5-8% of “other” pathways, which was its main advantage. Conversely in our isotopic calculations, we focused only on the ·OH+NO<sub>2</sub> and hetN<sub>2</sub>O<sub>5</sub> pathways because the δ<sup>18</sup>O end-member values for multiple reaction pathways were quite similar. Hence, those 5–8% of “other” pathways were attributed to the ·OH+NO<sub>2</sub> and hetN<sub>2</sub>O<sub>5</sub> pathways in our isotope calculations, potentially resulting in an overestimation of these two pathways compared to the CMAQ model. Notably, that the uncertainty in the pathway contribution calculations based on stable isotopes was approximately 10–30%. Nevertheless, as a receptor model, the isotopic method, based on observational data, provided robust evidence that supported the general patterns revealed by CMAQ (Figure R1). Additionally, we supplemented isotope calculation uncertainties in the manuscript and added a detailed comparison and discussion of both isotopic and CMAQ model results in the relevant section. A detailed explanation follows.

In our previous research, we compiled theoretical calculations of the thermodynamic fractionation of δ<sup>18</sup>O for the commonly considered atmospheric NO<sub>3</sub><sup>-</sup> formation pathways (Table R1), and P7, P8, and P9 were considered as the “other” reactions (Luo et al., 2020). However, due to the end-member values of δ<sup>18</sup>O being too close to those of hetN<sub>2</sub>O<sub>5</sub>, such as in the calculations for the winter of 2018 in Qingdao, the end-member δ<sup>18</sup>O value for the hetN<sub>2</sub>O<sub>5</sub> pathway was 102.6 ± 4.2 ‰. Conversely, the end-member values for P7, P8, and P9 were 105.8 ± 4.8 ‰, 126.4 ± 4.8 ‰, and 135.0 ± 4.8 ‰, respectively. This consideration was immature in actual pathway calculations; in more extensive research (Table R2), researchers primarily consider ·OH+NO<sub>2</sub> and hetN<sub>2</sub>O<sub>5</sub> the two main formation pathways when calculating atmospheric NO<sub>3</sub><sup>-</sup> formation.

In our isotope analysis, we employed the Stable Isotope Mixing Model in R (SIAR) to determine the relative contributions of different formation pathways to atmospheric NO<sub>3</sub><sup>-</sup>. The main sources of uncertainty stem from the standard deviations (SD) in each pathway’s end-member calculations and the posterior probability distributions generated by the model. As mentioned before, focusing on the most dominant pathways, rather than multiple pathways (Zhang et al., 2021; Luo et al., 2022), enhances the model’s reliability and reduces overall uncertainty. The posterior probability for each



pathway's contribution is obtained using the Hilborn sampling-importance-resampling method. For detailed information about the model framework and computational methods, please refer to Moore and Semmens (2008). We have added an explanation of model uncertainties in the Methods section (lines 237–239) and in Section 3.4 (lines (413–430) of the manuscript.

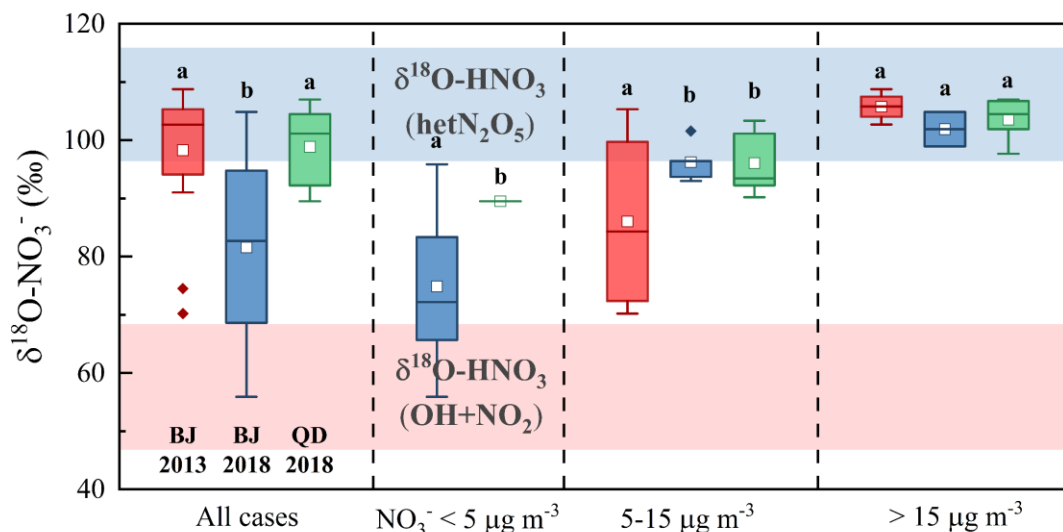

**Figure R1.** Boxplot of  $\delta^{18}\text{O}$  of atmospheric  $\text{NO}_3^-$  collected in Beijing in the winters of 2013 and 2018 and in Qingdao in the winter of 2018 under different nitrate conditions. The shadows of red and blue indicate the ranges of  $\delta^{18}\text{O}-\text{NO}_3^-$  generated via the daytime and nocturnal pathways, respectively. Categories that share common letters do not differ in significance, which is set to 0.05.

**Table R1.** Calculated  $\delta^{18}\text{O}$  values of  $\text{NO}_y$  for each nitrate production pathway (Luo et al., 2020).

|     | Pathway                                                                    | Expression                                                                                                                     |
|-----|----------------------------------------------------------------------------|--------------------------------------------------------------------------------------------------------------------------------|
| R1  | $\text{NO} + \text{O}_3 \rightarrow \text{NO}_2 + \text{O}_2$              | $\delta^{18}\text{O}-\text{NO}_2 = \phi \delta^{18}\text{O}-\text{O}_3 + (1-\phi) \delta^{18}\text{O}-\text{R}/\text{HO}_2$    |
| R2  | $\text{NO} + \text{RO}_2/\text{HO}_2 \rightarrow \text{NO}_2 + \text{O}_2$ |                                                                                                                                |
| R3  | $\text{NO}_2 + \text{O}_3 \rightarrow \text{NO}_3$                         | $\delta^{18}\text{O}-\text{NO}_3 = 2/3 \delta^{18}\text{O}-\text{NO}_2 + 1/3 \delta^{18}\text{O}-\text{O}_3$                   |
| R4  | $\text{NO}_2 + \text{NO}_3 \rightarrow \text{N}_2\text{O}_5$               | $\delta^{18}\text{O}-\text{N}_2\text{O}_5 = 2/5 \delta^{18}\text{O}-\text{NO}_2 + 3/5 \delta^{18}\text{O}-\text{NO}_3$         |
| R5  | $\text{NO}_2 + \text{OH} \rightarrow \text{HNO}_3$                         | $\delta^{18}\text{O}-\text{HNO}_3 = 2/3 \delta^{18}\text{O}-\text{NO}_2 + 1/3 \delta^{18}\text{O}-\text{OH}$                   |
| R6  | $\text{N}_2\text{O}_5 + \text{H}_2\text{O} \rightarrow \text{HNO}_3$       | $\delta^{18}\text{O}-\text{HNO}_3 = 5/6 \delta^{18}\text{O}-\text{N}_2\text{O}_5 + 1/6 \delta^{18}\text{O}-\text{H}_2\text{O}$ |
| R7  | $\text{NO}_3 + \text{HC}/\text{DMS} \rightarrow \text{HNO}_3$              | $\delta^{18}\text{O}-\text{HNO}_3 = \delta^{18}\text{O}-\text{NO}_3$                                                           |
| R8  | $\text{N}_2\text{O}_5 + \text{Cl}^- \rightarrow \text{pNO}_3^-$            | $\delta^{18}\text{O}-\text{HNO}_3 = \delta^{18}\text{O}-\text{N}_2\text{O}_5$                                                  |
| R9  | $\text{ClNO}_3 + \text{H}_2\text{O} \rightarrow \text{HNO}_3$              | $\delta^{18}\text{O}-\text{HNO}_3 = 2/3 \delta^{18}\text{O}-\text{NO}_2 + 1/3 \delta^{18}\text{O}-\text{O}_3$                  |
| R10 | $\text{NO}_2 + \text{H}_2\text{O} \rightarrow \text{HNO}_3$                | $\delta^{18}\text{O}-\text{HNO}_3 = \delta^{18}\text{O}-\text{NO}_2$                                                           |

**Table R2.** Comparison of the contributions of major atmospheric NO<sub>3</sub><sup>-</sup> formation pathways in China

| Region       | City         | Lon<br>(°E) | Lat<br>(°N)       | Method                                  | Year      | Season | ·OH+NO <sub>2</sub> | hetN <sub>2</sub> O <sub>5</sub><br>(%) | NO <sub>3</sub> ·+HC | Reference          |
|--------------|--------------|-------------|-------------------|-----------------------------------------|-----------|--------|---------------------|-----------------------------------------|----------------------|--------------------|
| NCP          | Zibo         | 118.0547    | 36.8258           | Δ <sup>17</sup> O                       | 2022-2023 | Winter | 17.7                | 32.6                                    | 49.7                 | Feng et al., 2023  |
|              | Zhoukou      | 114.6464    | 33.6033           |                                         |           | 53.4   | 31.1                | 15.5                                    |                      |                    |
|              | Beijing      | 117.1231    | 39.0601           | Δ <sup>17</sup> O                       | 2021      | Winter | 18.0                | 29.1                                    | 52.9                 | Yan et al., 2023   |
|              |              |             |                   |                                         |           | Spring | 26.9                | 35.2                                    | 37.9                 |                    |
|              | Beijing      | 116.3660    | 39.9746           | δ <sup>15</sup> N and δ <sup>18</sup> O | 2017-2018 | Winter | 17.4                | 61.9                                    | 20.7                 | Luo et al., 2023   |
|              | Tianjin      | 117.4177    | 39.5557           | Δ <sup>17</sup> O                       | 2022      | Winter | 29.7                | 34.8                                    | 35.5                 | Zhang et al., 2024 |
|              |              |             |                   |                                         |           | Spring | 51.0                | 31.9                                    | 17.0                 |                    |
|              |              |             |                   |                                         |           | Summer | 41.8                | 33.6                                    | 24.6                 |                    |
|              |              |             |                   |                                         |           | Autumn | 13.2                | 34.7                                    | 52.1                 |                    |
|              | Shijiazhuang | 114.4942    | 38.0980           | δ <sup>15</sup> N and δ <sup>18</sup> O | 2017-2018 | Winter | 6.3                 | 66.0                                    | 27.7                 | Luo et al., 2023   |
|              | Tianjin      | 117.3350    | 38.9944           | δ <sup>18</sup> O                       | 2019-2020 | Winter | 31.4                | 68.6                                    | Zhang et al., 2022   |                    |
|              |              |             |                   |                                         |           | Spring | 57.4                | 42.6                                    |                      |                    |
|              |              |             |                   |                                         |           | Summer | 84.1                | 15.9                                    |                      |                    |
|              |              |             |                   |                                         |           | Autumn | 62.0                | 38.0                                    |                      |                    |
|              | Jiaozuo      | 113.2606    | 35.1865           | δ <sup>18</sup> O                       | 2020      | Winter | 30.0                | 70.0                                    | Li et al., 2022a     |                    |
| Summer       |              |             |                   |                                         |           | 61.0   | 39.0                |                                         |                      |                    |
| Beijing      | 116.3711     | 39.9744     | Δ <sup>17</sup> O | 2016                                    | Winter    | 42.6   | 25.4                | 31.7                                    | Fan et al., 2022     |                    |
|              |              |             |                   |                                         | 2017      | Summer | 46.2                | 23.0                                    |                      | 31.4               |
| Beijing      | 116.4167     | 40.0333     | δ <sup>18</sup> O | 2017-2018                               | Winter    | 67.4   | 32.6                | Zhang et al., 2021a                     |                      |                    |
| Tianjin      | 117.1500     | 39.0833     |                   |                                         |           | 58.1   | 41.9                |                                         |                      |                    |
| Shijiazhuang | 114.6377     | 38.0128     |                   |                                         |           | 50.5   | 49.5                |                                         |                      |                    |



|         |              |          |         |                                                 |           |        |      |      |      |                     |
|---------|--------------|----------|---------|-------------------------------------------------|-----------|--------|------|------|------|---------------------|
|         | Jinan        | 117.0500 | 36.6667 |                                                 |           |        | 50.6 | 49.4 |      |                     |
|         | Jiaozuo      | 113.2667 | 35.1833 |                                                 |           |        | 50.7 | 49.3 |      |                     |
|         | Beijing      | 117.7000 | 40.0667 | $\delta^{15}\text{N}$ and $\delta^{18}\text{O}$ | 2017-2018 | Winter | 45.3 | 46.5 | 8.2  | Zhang et al., 2021b |
|         |              |          |         |                                                 |           | Autumn | 51.8 | 48.2 |      |                     |
|         | Shijiazhuang | 114.6377 | 38.0128 | $\delta^{18}\text{O}$                           | 2017-2018 | Winter | 22.5 | 77.5 |      | Luo et al., 2021    |
|         |              |          |         |                                                 |           | Spring | 51.5 | 48.5 |      |                     |
|         |              |          |         |                                                 |           | Summer | 71.1 | 28.9 |      |                     |
|         |              |          |         |                                                 |           | Spring | 18.8 | 81.2 |      |                     |
|         | Beijing      | 116.3400 | 39.9300 | $\delta^{18}\text{O}$                           | 2013-2014 | Summer | 41.2 | 58.8 |      | Zong et al., 2020   |
|         |              |          |         |                                                 |           | Autumn | 17.9 | 82.1 |      |                     |
|         |              |          |         |                                                 |           | Winter | 17.3 | 82.7 |      |                     |
|         | Beijing      | 116.3667 | 39.9667 | $\delta^{18}\text{O}$                           | 2018      | Winter | 52.0 | 48.0 |      | Fan et al., 2020    |
|         | Beijing      | 116.4167 | 40.0333 | $\delta^{18}\text{O}$                           | 2017-2018 | Winter | 48.0 | 52.0 |      | Zhang et al., 2020a |
|         | Beijing      | 116.3800 | 39.9800 | $\delta^{18}\text{O}$                           | 2013      | Spring | 56.5 | 27.2 | 16.3 | Luo et al., 2020a   |
|         | Jinan        | 117.0500 | 36.6667 | $\delta^{18}\text{O}$                           | 2018      | Summer | 39.1 | 60.9 |      | Zhang et al., 2020b |
|         | Beijing      | 116.7000 | 40.0667 | $\Delta^{17}\text{O}$                           | 2015      | Winter | 29.5 | 35.1 | 35.6 | Song et al., 2020   |
|         | Beijing      | 116.4167 | 40.0333 | $\delta^{18}\text{O}$                           | 2017-2018 | Winter | 47.0 | 53.0 |      | Zhang et al., 2020c |
|         |              |          |         |                                                 |           | Spring | 27.0 | 35.0 | 38.0 |                     |
|         | Beijing      | 116.7000 | 40.0667 | $\Delta^{17}\text{O}$                           | 2014      | Summer | 40.9 | 36.1 | 32.9 | Wang et al., 2019   |
|         |              |          |         |                                                 |           | Autumn | 25.0 | 35.0 | 40.0 |                     |
|         |              |          |         |                                                 |           | Winter | 31.0 | 34.0 | 34.0 |                     |
|         | Beijing      | 116.6800 | 40.4100 | $\Delta^{17}\text{O}$                           | 2014-2015 | Winter | 23.5 | 76.5 |      | He et al., 2018     |
|         | Dongying     | 118.9833 | 37.7500 | $\delta^{18}\text{O}$                           | 2013      | Summer | 47.4 | 52.6 |      | Zong et al., 2018   |
|         |              |          |         |                                                 |           | Spring | 35.0 | 65.0 |      |                     |
| Central | Wuhan        | 114.3000 | 30.5300 | $\delta^{18}\text{O}$                           | 2018-2019 | Summer | 69.7 | 30.3 |      | Deng et al., 2024   |
|         |              |          |         |                                                 |           | Autumn | 34.5 | 65.5 |      |                     |

|     |          |          |         |                                                 |           |        |      |      |      |                    |
|-----|----------|----------|---------|-------------------------------------------------|-----------|--------|------|------|------|--------------------|
|     |          |          |         |                                                 | Winter    | 7.8    | 92.2 |      |      |                    |
|     |          |          |         |                                                 | Spring    | 64.0   | 19.0 | 17.0 |      |                    |
|     | Shiyan   | 111.4000 | 33.2000 | $\delta^{18}\text{O}$                           | 2021      | Summer | 84.0 | 8.0  | 8.0  | Xiao et al., 2024  |
|     |          |          |         |                                                 |           | Autumn | 64.0 | 19.0 | 18.0 |                    |
|     |          |          |         |                                                 |           | Winter | 25.0 | 38.0 | 37.0 |                    |
|     | Wuhan    | 104.3600 | 30.5200 | $\delta^{18}\text{O}$                           | 2013-2014 | Spring | 17.9 | 82.1 |      | Zong et al., 2020  |
|     |          |          |         |                                                 |           | Summer | 60.4 | 39.6 |      |                    |
|     |          |          |         |                                                 |           | Autumn | 28.5 | 71.5 |      |                    |
|     |          |          |         |                                                 |           | Winter | 11.2 | 88.8 |      |                    |
|     | Lanzhou  | 103.8551 | 36.0305 | $\delta^{15}\text{N}$ and $\delta^{18}\text{O}$ | 2017-2018 | Winter | 22.2 | 57.6 | 20.4 | Luo et al., 2023   |
|     | Shanghai | 121.4279 | 31.2595 | $\delta^{15}\text{N}$ and $\delta^{18}\text{O}$ | 2017-2018 | Winter | 18.3 | 47.9 | 33.8 | Luo et al., 2023   |
|     | Shanghai | 121.5000 | 31.3000 | $\delta^{18}\text{O}$                           | 2019      | Summer | 70.5 | 29.5 |      | Huang et al., 2024 |
|     |          |          |         |                                                 |           | Winter | 20.7 | 79.3 |      |                    |
|     | Shanghai | 121.5100 | 31.3400 | $\delta^{15}\text{N}$ and $\delta^{18}\text{O}$ | 2018      | Winter | 16.7 | 28.3 | 55.0 | Zhu et al., 2021   |
|     |          |          |         |                                                 | 2019      | Summer | 56.1 | 24.8 | 19.1 |                    |
|     | Shanghai | 121.5700 | 31.2600 | $\Delta^{17}\text{O}$                           | 2016      | Winter | 63.8 |      | 36.2 | He et al., 2020    |
|     |          |          |         |                                                 |           | Spring | 62.7 |      | 37.3 |                    |
| YRD | Shanghai | 121.5000 | 31.2900 | $\delta^{18}\text{O}$                           | 2013-2014 | Spring | 32.6 | 67.4 |      | Zong et al., 2020  |
|     |          |          |         |                                                 |           | Summer | 60.0 | 40.0 |      |                    |
|     |          |          |         |                                                 |           | Autumn | 27.7 | 72.3 |      |                    |
|     |          |          |         |                                                 |           | Winter | 6.2  | 93.8 |      |                    |
|     | Nanjing  | 118.7000 | 32.2000 | $\Delta^{17}\text{O}$                           | 2018      | Winter | 20.9 | 27.4 | 34.0 | Yu et al., 2023    |
|     |          |          |         |                                                 |           | Autumn | 18.9 | 34.0 | 47.1 |                    |
|     | Hangzhou | 120.1700 | 30.2300 | $\Delta^{17}\text{O}$                           | 2015-2016 | Winter | 24.1 | 34.8 | 41.1 | Fan et al., 2023   |
|     |          |          |         |                                                 |           | Spring | 18.3 | 35.0 | 46.7 |                    |
|     |          |          |         |                                                 |           | Summer | 40.5 | 35.2 | 24.3 |                    |

|           |           |          |         |                                                 |           |        |      |      |                   |                     |
|-----------|-----------|----------|---------|-------------------------------------------------|-----------|--------|------|------|-------------------|---------------------|
| Southeast | Xiamen    | 118.0900 | 24.4360 | $\delta^{18}\text{O}$                           | 2019-2021 | Cold   | 20.2 | 38.2 | 21.6              | Li et al., 2022b    |
|           |           |          |         |                                                 |           | Warm   | 30.3 | 31.5 | 18.3              |                     |
|           | Nanchang  | 115.8085 | 28.6832 | $\delta^{15}\text{N}$ and $\delta^{18}\text{O}$ | 2017-2018 | Winter | 17.2 | 43.6 | 39.2              | Luo et al., 2023    |
|           | Nanchang  | 115.9333 | 28.6833 | $\delta^{15}\text{N}$ and $\delta^{18}\text{O}$ | 2017-2018 | Winter | 30.4 | 36.8 | 32.8              | Zhang et al., 2021c |
|           | Nanchang  | 115.8085 | 28.6832 | $\delta^{18}\text{O}$                           | 2017-2018 | Autumn | 18.0 | 38.6 | 43.4              | Luo et al., 2020b   |
|           |           |          |         |                                                 |           | Winter | 7.5  | 33.8 | 58.7              |                     |
|           |           |          |         |                                                 |           | Spring | 33.2 | 34.5 | 32.3              |                     |
|           |           |          |         |                                                 |           | Summer | 58.7 | 28.1 | 13.2              |                     |
|           | Nanchang  | 115.9000 | 28.7000 | $\delta^{15}\text{N}$ and $\delta^{18}\text{O}$ | 2017      | Autumn | 37.1 | 60.3 | 2.6               | Xiao et al., 2020   |
|           | Ganzhou   | 114.7600 | 25.6600 | $\delta^{18}\text{O}$                           | 2019      | Winter | 41.6 | 29.5 | 28.9              | Cheng et al., 2022  |
| Summer    |           |          |         |                                                 |           | 73.5   | 14.1 | 12.4 |                   |                     |
| Southwest | Chengdu   | 104.0527 | 30.5598 | $\delta^{15}\text{N}$ and $\delta^{18}\text{O}$ | 2017-2018 | Winter | 23.5 | 40.8 | 35.7              | Luo et al., 2023    |
|           | Chengdu   | 104.3800 | 30.6400 | $\delta^{18}\text{O}$                           | 2013-2014 | Spring | 46.5 | 53.5 | Zong et al., 2020 |                     |
|           |           |          |         |                                                 |           | Summer | 61.8 | 38.2 |                   |                     |
|           |           |          |         |                                                 |           | Autumn | 29.1 | 70.9 |                   |                     |
|           |           |          |         |                                                 |           | Winter | 11.3 | 88.7 |                   |                     |
|           | Kunming   | 102.7000 | 25.0667 | $\delta^{18}\text{O}$                           | 2017-2018 | Autumn | 85.0 | 15.0 | Guo et al., 2021  |                     |
|           |           |          |         |                                                 |           | Winter | 74.4 | 25.6 |                   |                     |
|           | Nanning   | 108.2833 | 22.8333 | $\delta^{18}\text{O}$                           | 2013-2014 | Autumn | 87.9 | 12.1 | Li et al., 2021a  |                     |
|           |           |          |         |                                                 |           | Winter | 68.4 | 31.6 |                   |                     |
|           | Guiyang   | 106.7167 | 26.5667 | $\delta^{18}\text{O}$                           | 2016      | Winter | 38.3 | 61.7 | 19.8              | Luo et al., 2023    |
|           |           |          |         |                                                 | Summer    | 80.2   | 19.8 | 24.7 |                   |                     |
| PRD       | Guangzhou | 113.3689 | 23.1938 | $\delta^{18}\text{O}$                           | 2015-2018 | Spring | 70.4 | 22.8 | 6.8               | Xi et al., 2023     |
|           |           |          |         |                                                 |           | Summer | 85.6 | 10.9 | 3.5               |                     |
|           |           |          |         |                                                 |           | Autumn | 86.1 | 10.6 | 3.3               |                     |

|           |           |          |         |                       |           |        |      |      |      |                   |
|-----------|-----------|----------|---------|-----------------------|-----------|--------|------|------|------|-------------------|
|           |           |          |         |                       |           | Winter | 72.0 | 21.0 | 7.1  |                   |
|           | Guangzhou | 113.3397 | 23.1075 | $\Delta^{17}\text{O}$ | 2018      | Autumn | 61.0 | 12.0 | 27.0 | Wang et al., 2023 |
|           |           |          |         |                       |           | Spring | 48.0 | 52.0 |      |                   |
|           | Guangzhou | 113.3600 | 23.1500 | $\delta^{18}\text{O}$ | 2013-2014 | Summer | 66.9 | 33.1 |      | Zong et al., 2020 |
|           |           |          |         |                       |           | Autumn | 33.9 | 66.1 |      |                   |
|           |           |          |         |                       |           | Winter | 9.7  | 90.3 |      |                   |
|           | Harbin    | 126.6333 | 45.7469 | $\Delta^{17}\text{O}$ | 2022-2023 | Winter | 55.3 | 28.2 | 16.5 | Feng et al., 2023 |
|           |           |          |         |                       |           | Spring | 65.8 | 25.6 | 8.6  |                   |
|           | Shenyang  | 123.4300 | 41.7700 |                       |           | Summer | 95.3 | 3.0  | 1.7  |                   |
|           |           |          |         |                       |           | Autumn | 83.0 | 12.1 | 4.8  |                   |
|           |           |          |         | $\Delta^{17}\text{O}$ | 2015-2018 | Winter | 57.7 | 30.9 | 11.4 | Li et al., 2022c  |
|           |           |          |         |                       |           | Spring | 40.0 | 34.5 | 25.5 |                   |
|           | Fushun    | 124.9400 | 41.8500 |                       |           | Summer | 85.7 | 9.6  | 4.7  |                   |
|           |           |          |         |                       |           | Autumn | 46.0 | 35.9 | 18.1 |                   |
|           |           |          |         |                       |           | Winter | 37.6 | 33.2 | 29.2 |                   |
| Northeast | Harbin    | 126.7400 | 45.7300 |                       |           |        | 69.4 | 30.6 |      |                   |
|           | Changchun | 125.4000 | 43.8500 |                       |           |        |      |      |      |                   |
|           |           |          |         | $\delta^{18}\text{O}$ | 2017-2018 | Winter | 50.2 | 49.8 |      | Zhao et al., 2021 |
|           | Harbin    | 126.5300 | 45.8400 |                       |           |        | 50.1 | 49.9 |      |                   |
|           | Yushu     | 126.5300 | 44.8600 |                       |           |        | 37.3 | 62.7 |      |                   |
|           |           |          |         |                       |           | Spring | 46.4 | 53.6 |      |                   |
|           | Harbin    | 120.6817 | 45.7539 | $\delta^{18}\text{O}$ | 2017-2018 | Summer | 68.7 | 31.2 |      | Sun et al., 2020  |
|           |           |          |         |                       |           | Autumn | 56.1 | 43.9 |      |                   |
|           |           |          |         |                       |           | Winter | 44.8 | 55.2 |      |                   |
|           |           |          |         |                       |           | Summer | 79.7 | 20.3 |      |                   |
|           | Changchun | 125.4000 | 44.0000 | $\delta^{18}\text{O}$ | 2017-2018 | Autumn | 56.1 | 43.9 |      | Zhao et al., 2020 |
|           |           |          |         |                       |           | Winter | 55.9 | 44.1 |      |                   |

|        |                          |          |                       |                       |      |        |        |        |                   |                          |      |
|--------|--------------------------|----------|-----------------------|-----------------------|------|--------|--------|--------|-------------------|--------------------------|------|
|        |                          |          |                       |                       |      | Spring | 58.0   | 42.0   |                   |                          |      |
|        |                          |          |                       |                       |      | Autumn | 35.0   | 65.0   |                   |                          |      |
| Island | Beihuangcheng Island     | 120.9167 | 36.4000               | $\delta^{18}\text{O}$ | 2015 | Winter | 24.0   | 76.0   | Zong et al., 2017 |                          |      |
|        |                          |          |                       |                       |      | Spring | 47.0   | 53.0   |                   |                          |      |
|        |                          |          |                       |                       |      | Summer | 68.0   | 32.0   |                   |                          |      |
|        |                          |          |                       |                       |      |        |        |        |                   |                          |      |
|        | Dongsha Island           | 116.7167 | 20.7000               | $\delta^{18}\text{O}$ | 2013 | Spring | 66.8   | 10.2   | 23.0              | Yang et al., 2023        |      |
|        | Pengjiayu Island         | 122.1333 | 26.0500               |                       |      |        |        | 62.1   |                   |                          | 23.4 |
|        | Bohai Sea and Yellow Sea |          | 32 - 34               | $\Delta^{17}\text{O}$ | 2018 | Spring | 60.0   | 24.0   | 16.0              | Zhao et al., 2024        |      |
|        |                          | 34 - 36  | 49.0                  |                       |      |        | 31.0   | 19.0   |                   |                          |      |
|        |                          | 36 - 38  | 26.0                  |                       |      |        | 35.0   | 39.0   |                   |                          |      |
|        |                          | 38 - 40  | 14.0                  |                       |      |        | 34.0   | 52.0   |                   |                          |      |
| Marine | Bohai Sea                | 38 - 40  | $\delta^{18}\text{O}$ |                       |      | 2014   | Summer | 65.9   | 34.1              | Zong et al., 2022        |      |
|        |                          |          |                       |                       |      |        | Winter | 43.9   | 56.1              |                          |      |
|        |                          |          |                       |                       |      | 2016   | Summer | 49.3   | 50.7              |                          |      |
|        |                          |          |                       |                       |      |        | Winter | 41.1   | 58.9              |                          |      |
|        |                          |          |                       |                       |      | 2017   | Summer | 73.6   | 26.4              |                          |      |
|        |                          |          |                       |                       |      |        | Winter | 26.4   | 73.6              |                          |      |
|        |                          |          |                       |                       |      | 2018   | Summer | 61.0   | 39.0              |                          |      |
|        |                          |          |                       |                       |      |        | Winter | 32.0   | 68.0              |                          |      |
|        |                          |          |                       |                       |      | 2019   | Summer | 61.7   | 38.3              |                          |      |
|        |                          |          |                       |                       |      |        | Winter | 28.5   | 71.5              |                          |      |
| NCP    | Beijing                  | 116.4125 | 40.2352               | CMAQ                  |      |        | 2013   | 77.8   | 14.3              | Liu et al., under review |      |
|        |                          |          |                       |                       |      |        | 2018   | 85.6   | 9.9               |                          |      |
|        | Tianjin                  | 117.4812 | 39.0929               |                       |      |        | 2013   | Winter | 67.8              |                          | 19.7 |
|        |                          |          |                       |                       |      |        | 2018   | 77.5   | 15.1              |                          |      |
|        | Shijiazhuang             | 114.5562 | 37.8247               |                       |      |        | 2013   | 73.8   | 14.2              |                          |      |

|     |           |          |         |          |      |        |      |      |                   |
|-----|-----------|----------|---------|----------|------|--------|------|------|-------------------|
|     |           |          |         |          | 2018 |        | 83.6 | 8.3  |                   |
|     | Jinan     | 116.9187 | 36.8712 |          | 2013 |        | 63.7 | 27.7 |                   |
|     |           |          |         |          | 2018 |        | 72.9 | 19.9 |                   |
|     | Zhengzhou | 113.8719 | 34.7968 |          | 2013 |        | 77.6 | 10.6 |                   |
|     |           |          |         |          | 2018 |        | 79.2 | 12.7 |                   |
|     | Qingdao   | 120.5000 | 36.1533 |          | 2013 |        | 51.5 | 41.5 |                   |
|     |           |          |         |          | 2018 |        | 56.5 | 37.0 |                   |
|     | Yantai    | 121.4187 | 37.4197 |          | 2013 |        | 48.2 | 45.7 |                   |
|     |           |          |         |          | 2018 |        | 50.4 | 43.5 |                   |
| NCP |           | 115.4817 | 36.6111 | WRF-Chem | 2021 | Winter | 51.0 | 45.0 | Yang et al., 2024 |
| NCP |           | 114.8000 | 39.5000 | WRF-Chem | 2017 | Winter | 48.0 | 30.3 | Zhao et al., 2023 |
|     |           |          |         |          |      | Winter | 69.3 | 28.4 |                   |
|     | Shanghai  | 120.8662 | 28.0818 |          |      | Spring | 81.8 | 15.3 |                   |
|     |           |          |         |          |      | Summer | 82.9 | 12.2 |                   |
|     |           |          |         |          |      | Autumn | 86.9 | 11.1 |                   |
|     |           |          |         |          |      | Winter | 59.2 | 36.1 |                   |
|     | Nanjing   | 118.6491 | 28.7744 |          |      | Spring | 73.1 | 5.4  |                   |
|     |           |          |         |          |      | Summer | 74.7 | 17.9 |                   |
| YRD |           |          |         | CMAQ     | 2017 | Autumn | 69.7 | 25.4 | Sun et al., 2022  |
|     |           |          |         |          |      | Winter | 66.9 | 27.1 |                   |
|     | Hefei     | 117.3881 | 28.5389 |          |      | Spring | 78.5 | 16.5 |                   |
|     |           |          |         |          |      | Summer | 81.7 | 10.4 |                   |
|     |           |          |         |          |      | Autumn | 72.5 | 21.8 |                   |
|     |           |          |         |          |      | Winter | 68.9 | 26.8 |                   |
|     | Changzhou | 119.6087 | 28.4776 |          |      | Spring | 74.9 | 20.9 |                   |
|     |           |          |         |          |      | Summer | 78.7 | 14.3 |                   |

|         |          |          |         |             |           |        |        |      |                     |
|---------|----------|----------|---------|-------------|-----------|--------|--------|------|---------------------|
|         |          |          |         |             |           | Autumn | 77.6   | 18.3 |                     |
|         |          |          |         |             |           | Winter | 59.7   | 35.5 |                     |
|         |          |          |         |             |           | Spring | 70.5   | 23.3 |                     |
|         |          |          |         |             |           | Summer | 76.4   | 10.7 |                     |
|         |          |          |         |             |           | Autumn | 73.8   | 21.3 |                     |
|         | Hangzhou | 119.7671 | 27.1448 |             |           |        |        |      |                     |
| YRD     | Shanghai | 120.9890 | 31.0970 | F0AM        | 2019      | Winter | 42.9   | 55.5 | Zang et al., 2022   |
|         |          | 121.5330 | 31.2280 |             |           |        | 36.8   | 62.1 |                     |
| NCP     |          | 114.8000 | 39.5000 |             |           | Summer | 60.4   | 39.6 |                     |
|         |          |          |         | WRF-Chem    | 2016      | Winter | 91.9   | 8.1  | Li et al., 2021b    |
| YRD     |          | 121.0000 | 31.1000 |             |           | Summer | 75.3   | 24.7 |                     |
|         |          |          |         |             |           | Winter | 86.2   | 13.8 |                     |
| NCP     |          | 114.8000 | 39.5000 | WRF-Chem    | 2016      | Winter | 53.4   | 46.6 | Liu et al., 2020    |
| Taiwan  |          | 120.6753 | 21.1892 | WRF-CMAQ PA | 2017      | Spring | > 45.0 | 30.0 | Chuang et al., 2022 |
| PRD     |          | 113.3600 | 23.1500 | WRF-CMAQ PA | 2015      | Winter | 47.0   | 34.0 | Qu et al., 2021     |
| Central | Xi'an    | 108.9552 | 34.2919 | WRF-Chem    | 2017      | Winter |        | 24.0 | Wu et al., 2021     |
| NCP     | Beijing  | 116.6800 | 40.4100 | GEOS-Chem   | 2014-2015 | Winter | 34.4   | 44.9 | Chan et al., 2021   |
| NCP     |          | 114.8000 | 39.5000 | WRF-CMAQ PA | 2017      | Winter | 43.0   | 44.0 | Fu et al., 2020     |
| NCP     | Beijing  | 116.6800 | 40.4100 | Box model   | 2016-2017 | Winter | 68.8   | 31.2 | Chen et al., 2020   |
| YRD     | Nanjing  | 118.6491 | 28.7744 | Box model   | 2015      | Winter |        | 80   | Sun et al., 2018    |
| NCP     | Beijing  | 116.6800 | 40.4100 | CMAQ        | 2017      | Winter |        | 42   | Qiu et al., 2019    |
| NCP     |          | 114.8000 | 39.5000 | WRF-Chem    | 2015      | Winter |        | 30.1 | Liu et al., 2019    |
| PRD     |          | 113.3600 | 23.1500 | WRF-Chem    | 2013      | Winter |        | 57.4 | Li et al., 2016     |

Chan, Y.C., Evans, M.J., He, P., Holmes, C.D., Jaeglé, L., Kasibhatla, P., Liu, X.Y., Sherwen, T., Thornton, J.A., Wang, X., Xie, Z., Zhai, S., Alexander, B., 2021. Heterogeneous nitrate production mechanisms in intense haze events in the North China Plain. *Journal of geophysical research. Atmospheres* 126, e2021JD034688. <https://doi.org/10.1029/2021JD034688>.

Cheng, C., Yu, R., Chen, Y., Yan, Y., Hu, G., Wang, S., 2022. Quantifying the source and formation of nitrate in PM<sub>2.5</sub> using dual isotopes combined with Bayesian



- mixing model: A case study in an inland city of southeast China. *Chemosphere* 308, 136097. <https://doi.org/10.1016/j.chemosphere.2022.136097>.
- Chuang, M., Wu, C., Lin, C., Lin, W., Chou, C.C.K., Lee, C., Lin, T., Fu, J.S., Kong, S.S., 2022. Simulating nitrate formation mechanisms during PM<sub>2.5</sub> events in Taiwan and their implications for the controlling direction. *Atmos Environ* 269, 118856. <https://doi.org/10.1016/j.atmosenv.2021.118856>.
- Deng, M., Wang, C., Yang, C., Li, X., Cheng, H., 2024. Nitrogen and oxygen isotope characteristics, formation mechanism, and source apportionment of nitrate aerosols in Wuhan, central China. *Sci Total Environ* 921, 170715. <https://doi.org/10.1016/j.scitotenv.2024.170715>.
- Fan, M., Zhang, Y., Lin, Y., Hong, Y., Zhao, Z., Xie, F., Du, W., Cao, F., Sun, Y., Fu, P., 2022. Important role of NO<sub>3</sub> radical to nitrate formation aloft in urban Beijing: Insights from triple oxygen isotopes measured at the tower. *Environ Sci Technol* 56 (11), 6870-6879. <https://doi.org/10.1021/acs.est.1c02843>.
- Fan, M.Y., Zhang, W., Zhang, Y.L., Li, J., Fang, H., Cao, F., Yan, M., Hong, Y., Guo, H., Michalski, G., 2023. Formation mechanisms and source apportionments of nitrate aerosols in a megacity of eastern China based on multiple isotope observations. *Journal of Geophysical Research: Atmospheres* 128, e2022JD038129. <https://doi.org/10.1029/2022JD038129>.
- Fan, M.Y., Zhang, Y.L., Lin, Y.C., Cao, F., Zhao, Z.Y., Sun, Y., Qiu, Y., Fu, P., Wang, Y., 2020. Changes of emission sources to nitrate aerosols in Beijing after the clean air actions: Evidence from dual isotope compositions. *Journal of Geophysical Research: Atmospheres* 125, e2019JD031998. <https://doi.org/10.1029/2019JD031998>.
- Feng, X., Chen, Y., Chen, S., Peng, Y., Liu, Z., Jiang, M., Feng, Y., Wang, L., Li, L., Chen, J., 2023. Dominant contribution of NO<sub>3</sub> radical to NO<sub>3</sub><sup>-</sup> formation during heavy haze episodes: Insights from high-time resolution of dual isotopes δ<sup>17</sup>O and δ<sup>18</sup>O. *Environ Sci Technol* 57 (49), 20726-20735. <https://doi.org/10.1021/acs.est.3c07590>.
- Fu, X., Wang, T., Gao, J., Wang, P., Liu, Y., Wang, S., Zhao, B., Xue, L., 2020. Persistent heavy winter nitrate pollution driven by increased photochemical oxidants in northern China. *Environ Sci Technol* 54 (7), 3881-3889. <https://doi.org/10.1021/acs.est.9b07248>.
- Guo, W., Luo, L., Zhang, Z., Zheng, N., Xiao, H., Xiao, H., 2021. The use of stable oxygen and nitrogen isotopic signatures to reveal variations in the nitrate formation pathways and sources in different seasons and regions in China. *Environ Res* 201, 111537. <https://doi.org/10.1016/j.envres.2021.111537>.
- He, P., Xie, Z., Chi, X., Yu, X., Fan, S., Kang, H., Liu, C., Zhan, H., 2018. Atmospheric Δ<sup>17</sup>O(NO<sub>3</sub><sup>-</sup>) reveals nocturnal chemistry dominates nitrate production in Beijing haze. *Atmos Chem Phys* 18 (19), 14465-14476. <https://doi.org/10.5194/acp-18-14465-2018>.
- He, P., Xie, Z., Yu, X., Wang, L., Kang, H., Yue, F., 2020. The observation of isotopic compositions of atmospheric nitrate in Shanghai China and its implication for reactive nitrogen chemistry. *Sci Total Environ* 714, 136727. <https://doi.org/10.1016/j.scitotenv.2020.136727>.
- Huang, W., Ye, X., Lv, Z., Yao, Y., Chen, Y., Zhou, Y., Chen, J., 2024. Dual isotopic evidence of δ<sup>15</sup>N and δ<sup>18</sup>O for priority control of vehicle emissions in a megacity of east China: Insight from measurements in summer and winter. *Sci Total Environ* 931, 172918. <https://doi.org/10.1016/j.scitotenv.2024.172918>.

- Li, M., Zhang, Z., Yao, Q., Wang, T., Xie, M., Li, S., Zhuang, B., Han, Y., 2021b. Nonlinear responses of particulate nitrate to NO<sub>x</sub> emission controls in the megalopolises of China. *Atmos Chem Phys* 21 (19), 15135-15152. <https://doi.org/10.5194/acp-21-15135-2021>.
- Li, Q., Li, X., Yang, Z., Cui, G., Ding, S., 2021a. Diurnal and seasonal variations in water-soluble inorganic ions and nitrate dual isotopes of PM<sub>2.5</sub>: Implications for source apportionment and formation processes of urban aerosol nitrate. *Atmos Res* 248, 105197. <https://doi.org/10.1016/j.atmosres.2020.105197>.
- Li, Q., Zhang, L., Wang, T., Tham, Y.J., Ahmadov, R., Xue, L., Zhang, Q., Zheng, J., 2016. Impacts of heterogeneous uptake of dinitrogen pentoxide and chlorine activation on ozone and reactive nitrogen partitioning: improvement and application of the WRF-Chem model in southern China. *Atmos Chem Phys* 16, 14875-14890. <https://doi.org/10.5194/acp-16-14875-2016>.
- Li, X., Wu, S., Zhang, J., Schwab, J.J., 2022b. Insights into factors affecting size-segregated nitrate formation in a coastal city through measurements of dual isotopes. *Atmos Environ* 290, 119385. <https://doi.org/10.1016/j.atmosenv.2022.119385>.
- Li, Y., Geng, Y., Hu, X., Yin, X., 2022a. Seasonal differences in sources and formation processes of PM<sub>2.5</sub> nitrate in an urban environment of North China. *J Environ Sci-China* 120, 94-104. <https://doi.org/10.1016/j.jes.2021.08.020>.
- Li, Z., Walters, W.W., Hastings, M.G., Song, L., Huang, S., Zhu, F., Liu, D., Shi, G., Li, Y., Fang, Y., 2022c. Atmospheric nitrate formation pathways in urban and rural atmosphere of Northeast China: implications for complicated anthropogenic effects. *Environ Pollut* 296, 118752. <https://doi.org/10.1016/j.envpol.2021.118752>.
- Liu, L., Bei, N., Hu, B., Wu, J., Liu, S., Li, X., Wang, R., Liu, Z., Shen, Z., Li, G., 2020. Wintertime nitrate formation pathways in the North China Plain: importance of N<sub>2</sub>O<sub>5</sub> heterogeneous hydrolysis. *Environ Pollut* 266, 115287. <https://doi.org/10.1016/j.envpol.2020.115287>.
- Liu, L., Wu, J., Liu, S., Li, X., Zhou, J., Feng, T., Qian, Y., Gao, J., Tie, X., Li, G., 2019. Effects of organic coating on the nitrate formation by suppressing the N<sub>2</sub>O<sub>5</sub> heterogeneous hydrolysis: a case study during wintertime in Beijing–Tianjin–Hebei (BTH). *Atmos Chem Phys* 19, 8189-8207. <https://doi.org/10.5194/acp-19-8189-2019>.
- Liu, Z., Liu, X., Ni, Y., Qi, J. Exploring Atmospheric Nitrate Formation Mechanisms during the Winters of 2013 and 2018 in the North China Region using Modeling and Isotopic Analysis. *Atmos Chem Phys*, under review.
- Luo, L., Kao, S., Wu, Y., Zhang, X., Lin, H., Zhang, R., Xiao, H., 2020. Stable oxygen isotope constraints on nitrate formation in Beijing in springtime. *Environ Pollut* 263, 114515. <https://doi.org/10.1016/j.envpol.2020.114515>.
- Luo, L., Liao, T., Zhang, X., Wu, Y., Li, J., Zhang, R., Zheng, Z., Kao, S., 2023. Quantifying the formation pathways of nitrate in size-segregated aerosols during winter haze pollution. *Gondwana Res* 115, 71-80. <https://doi.org/10.1016/j.gr.2022.11.015>.
- Luo, L., Pan, Y., Zhu, R., Zhang, Z., Zheng, N., Liu, Y., Liu, C., Xiao, H., Xiao, H., 2020b. Assessment of the seasonal cycle of nitrate in PM<sub>2.5</sub> using chemical compositions and stable nitrogen and oxygen isotopes at Nanchang, China. *Atmos Environ* 225, 117371. <https://doi.org/10.1016/j.atmosenv.2020.117371>.

- Luo, L., Zhu, R., Song, C., Peng, J., Guo, W., Liu, Y., Zheng, N., Xiao, H., Xiao, H., 2021. Changes in nitrate accumulation mechanisms as PM<sub>2.5</sub> levels increase on the North China Plain: a perspective from the dual isotopic compositions of nitrate. *Chemosphere* 263, 127915. <https://doi.org/10.1016/j.chemosphere.2020.127915>.
- Moore, J.W., Semmens, B.X., 2008. Incorporating uncertainty and prior information into stable isotope mixing models. *Ecol Lett* 11 (5), 470-480. <https://doi.org/10.1111/j.1461-0248.2008.01163.x>.
- Qiu, X., Ying, Q., Wang, S., Duan, L., Zhao, J., Xing, J., Ding, D., Sun, Y., Liu, B., Shi, A., Yan, X., Xu, Q., Hao, J., 2019. Modeling the impact of heterogeneous reactions of chlorine on summertime nitrate formation in Beijing, China. *Atmos Chem Phys* 19 (10), 6737-6747. <https://doi.org/10.5194/acp-19-6737-2019>.
- Qu, K., Wang, X., Xiao, T., Shen, J., Lin, T., Chen, D., He, L., Huang, X., Zeng, L., Lu, K., Ou, Y., Zhang, Y., 2021. Cross-regional transport of PM<sub>2.5</sub> nitrate in the Pearl River Delta, China: Contributions and mechanisms. *Sci Total Environ* 753, 142439. <https://doi.org/10.1016/j.scitotenv.2020.142439>.
- Song, W., Liu, X., Wang, Y., Tong, Y., Bai, Z., Liu, C., 2020. Nitrogen isotope differences between atmospheric nitrate and corresponding nitrogen oxides: a new constraint using oxygen isotopes. *Sci Total Environ* 701, 134515. <https://doi.org/10.1016/j.scitotenv.2019.134515>.
- Sun, J., Qin, M., Xie, X., Fu, W., Qin, Y., Sheng, L., Li, L., Li, J., Sulaymon, I.D., Jiang, L., Huang, L., Yu, X., Hu, J., 2022. Seasonal modeling analysis of nitrate formation pathways in Yangtze River Delta region, China. *Atmos Chem Phys* 22 (18), 12629-12646. <https://doi.org/10.5194/acp-22-12629-2022>.
- Sun, X., Zong, Z., Wang, K., Li, B., Fu, D., Shi, X., Tang, B., Lu, L., Thapa, S., Qi, H., Tian, C., 2020. The importance of coal combustion and heterogeneous reaction for atmospheric nitrate pollution in a cold metropolis in China: insights from isotope fractionation and Bayesian mixing model. *Atmos Environ* 243, 117730. <https://doi.org/10.1016/j.atmosenv.2020.117730>.
- Wang, Y., Liu, J., Jiang, F., Chen, Z., Wu, L., Zhou, S., Pei, C., Kuang, Y., Cao, F., Zhang, Y., Fan, M., Zheng, J., Li, J., Zhang, G., 2023. Vertical measurements of stable nitrogen and oxygen isotope composition of fine particulate nitrate aerosol in Guangzhou city: source apportionment and oxidation pathway. *Sci Total Environ* 865, 161239. <https://doi.org/10.1016/j.scitotenv.2022.161239>.
- Wang, Y.L., Song, W., Yang, W., Sun, X.C., Tong, Y.D., Wang, X.M., Liu, C.Q., Bai, Z.P., Liu, X.Y., 2019. Influences of atmospheric pollution on the contributions of major oxidation pathways to PM<sub>2.5</sub> nitrate formation in Beijing. *Journal of Geophysical Research: Atmospheres* 124, 4174-4185. <https://doi.org/10.1029/2019JD030284>.
- Wu, C., Liu, L., Wang, G., Zhang, S., Li, G., Lv, S., Li, J., Wang, F., Meng, J., Zeng, Y., 2021. Important contribution of N<sub>2</sub>O<sub>5</sub> hydrolysis to the daytime nitrate in Xi'an, China during haze periods: Isotopic analysis and WRF-Chem model simulation. *Environ Pollut* 288, 117712. <https://doi.org/10.1016/j.envpol.2021.117712>.
- Xi, D., Xiao, Y., Mgelwa, A.S., Kuang, Y., 2023. Formation pathways and source apportionments of inorganic nitrogen-containing aerosols in urban environment: insights from nitrogen and oxygen isotopic compositions in Guangzhou, China. *Atmos Environ* 309, 119888. <https://doi.org/10.1016/j.atmosenv.2023.119888>.

- Xiao, C., Sun, Y., Zhao, T., Wang, G., Li, P., Zhao, Y., Chen, F., 2024. Assessment major NO<sub>x</sub> sources to nitrate of tsp around the Danjiangkou reservoir using isotopes and a Bayesian isotope mixing model. *Atmos Pollut Res* 15 (7). <https://doi.org/10.1016/j.apr.2024.102151>.
- Xiao, H.W., Zhu, R.G., Pan, Y.Y., Guo, W., Zheng, N.J., Liu, Y.H., Liu, C., Zhang, Z.Y., Wu, J.F., Kang, C.A., Luo, L., Xiao, H.Y., 2020. Differentiation between nitrate aerosol formation pathways in a southeast Chinese city by dual isotope and modeling studies. *Journal of Geophysical Research: Atmospheres* 125, e2020JD032604. <https://doi.org/10.1029/2020JD032604>.
- Yan, X., Hu, B., Li, Y., Shi, G., 2023. Investigating atmospheric nitrate sources and formation pathways between heating and non-heating seasons in urban North China. *Environ Res Lett* 18 (3), 34006. <https://doi.org/10.1088/1748-9326/acb805>.
- Yang, J., Qu, Y., Chen, Y., Zhang, J., Liu, X., Niu, H., An, J., 2024. Dominant physical and chemical processes impacting nitrate in Shandong of the North China Plain during winter haze events. *Sci Total Environ* 912, 169065. <https://doi.org/10.1016/j.scitotenv.2023.169065>.
- Yang, S., Luo, L., Li, Y., Wang, C., Lu, B., Hsu, S., Kao, S., 2023. Dry deposition fluxes, formation mechanisms and sources of nitrate in total suspended particles in springtime on Dongsha Island, South China Sea. *Journal of Earth Environment* 14 (2), 193-206. <https://doi.org/10.7515/jee222049>.
- Yu, H., Zhang, Y., Cao, F., Zhao, Z., Fan, M., Yang, X., 2023. Fog event is possibly a source rather than a sink of atmospheric nitrate aerosols: Insights from isotopic measurements in Nanjing, China. *Appl Geochem* 155, 105721. <https://doi.org/10.1016/j.apgeochem.2023.105721>.
- Zang, H., Zhao, Y., Huo, J., Zhao, Q., Fu, Q., Duan, Y., Shao, J., Huang, C., An, J., Xue, L., Li, Z., Li, C., Xiao, H., 2022. High atmospheric oxidation capacity drives wintertime nitrate pollution in the eastern Yangtze River Delta of China. *Atmos Chem Phys* 22 (7), 4355-4374. <https://doi.org/10.5194/acp-22-4355-2022>.
- Zhang, W., Bi, X., Zhang, Y., Wu, J., Feng, Y., 2022. Diesel vehicle emission accounts for the dominate NO<sub>x</sub> source to atmospheric particulate nitrate in a coastal city: Insights from nitrate dual isotopes of PM<sub>2.5</sub>. *Atmos Res* 278, 106328. <https://doi.org/10.1016/j.atmosres.2022.106328>.
- Zhang, W., Wu, F., Luo, X., Song, L., Wang, X., Zhang, Y., Wu, J., Xiao, Z., Cao, F., Bi, X., Feng, Y., 2024. Quantification of NO<sub>x</sub> sources contribution to ambient nitrate aerosol, uncertainty analysis and sensitivity analysis in a megacity. *Sci Total Environ* 926, 171583. <https://doi.org/10.1016/j.scitotenv.2024.171583>.
- Zhang, Z., Cao, L., Liang, Y., Guo, W., Guan, H., Zheng, N., 2021c. Importance of NO<sub>3</sub> radical in particulate nitrate formation in a southeast Chinese urban city: new constraints by  $\delta^{15}\text{N}$ - $\delta^{18}\text{O}$  space of NO<sub>3</sub><sup>-</sup>. *Atmos Environ* 253, 118387. <https://doi.org/10.1016/j.atmosenv.2021.118387>.
- Zhang, Z., Guan, H., Luo, L., Zheng, N., Xiao, H., 2020c. Response of fine aerosol nitrate chemistry to clean air action in winter Beijing: insights from the oxygen isotope signatures. *Sci Total Environ* 746, 141210. <https://doi.org/10.1016/j.scitotenv.2020.141210>.
- Zhang, Z., Guan, H., Luo, L., Zheng, N., Xiao, H., Liang, Y., Xiao, H., 2020a. Sources and transformation of nitrate aerosol in winter 2017–2018 of megacity Beijing: Insights from an alternative approach. *Atmos Environ* 241, 117842. <https://doi.org/10.1016/j.atmosenv.2020.117842>.
- Zhang, Z., Guan, H., Xiao, H., Liang, Y., Zheng, N., Luo, L., Liu, C., Fang, X., Xiao, H., 2021b. Oxidation and sources of atmospheric NO<sub>x</sub> during winter in Beijing

based on  $\delta^{18}\text{O}$ - $\delta^{15}\text{N}$  space of particulate nitrate. *Environ Pollut* 276, 116708. <https://doi.org/10.1016/j.envpol.2021.116708>.

Zhang, Z., Jiang, Z., Guan, H., Liang, Y., Zheng, N., Guo, W., 2021a. Isotopic evidence for the high contribution of wintertime photochemistry to particulate nitrate formation in northern China. *Journal of Geophysical Research: Atmospheres* 126, e2021JD035324. <https://doi.org/10.1029/2021JD035324>.

Zhang, Z., Zheng, N., Liang, Y., Luo, L., Xiao, H., Xiao, H., 2020b. Dominance of heterogeneous chemistry in summertime nitrate accumulation: insights from oxygen isotope of nitrate ( $\delta^{18}\text{O}$ - $\text{NO}_3^-$ ). *Acs Earth Space Chem* 4 (6), 818-824. <https://doi.org/10.1021/acsearthspacechem.0c00101>.

Zhao, X., Zhao, X., Liu, P., Chen, D., Zhang, C., Xue, C., Liu, J., Xu, J., Mu, Y., 2023. Transport pathways of nitrate formed from nocturnal  $\text{N}_2\text{O}_5$  hydrolysis aloft to the ground level in winter North China Plain. *Environ Sci Technol* 57 (7), 2715-2725. <https://doi.org/10.1021/acs.est.3c00086>.

Zhao, Z., Cao, F., Fan, M., Zhai, X., Yu, H., Hong, Y., Ma, Y., Zhang, Y., 2021. Nitrate aerosol formation and source assessment in winter at different regions in Northeast China. *Atmos Environ* 267, 118767. <https://doi.org/10.1016/j.atmosenv.2021.118767>.

Zhao, Z., Cao, F., Fan, M., Zhang, W., Zhai, X., Wang, Q., Zhang, Y., 2020. Coal and biomass burning as major emissions of  $\text{NO}_x$  in Northeast China: implication from dual isotopes analysis of fine nitrate aerosols. *Atmos Environ* 242, 117762. <https://doi.org/10.1016/j.atmosenv.2020.117762>.

Zhao, Z.Y., Zhang, Y.L., Lin, Y.C., Song, W.H., Yu, H.R., Fan, M.Y., Hong, Y.H., Yang, X.Y., Li, H.Y., Cao, F., 2024. Continental emissions influence the sources and formation mechanisms of marine nitrate aerosols in spring over the Bohai Sea and Yellow Sea inferred from stable isotopes. *Journal of Geophysical Research: Atmospheres* 129, e2023JD040541. <https://doi.org/10.1029/2023JD040541>.

Zhu, Y., Zhou, S., Li, H., Luo, L., Wang, F., Bao, Y., Chen, Y., 2021. Formation pathways and sources of size-segregated nitrate aerosols in a megacity identified by dual isotopes. *Atmos Environ* 264, 118708. <https://doi.org/10.1016/j.atmosenv.2021.118708>.

Zong, Z., Tan, Y., Wang, X., Tian, C., Fang, Y., Chen, Y., Fang, Y., Han, G., Li, J., Zhang, G., 2018. Assessment and quantification of  $\text{NO}_x$  sources at a regional background site in North China: comparative results from a Bayesian isotopic mixing model and a positive matrix factorization model. *Environ Pollut* 242, 1379-1386. <https://doi.org/10.1016/j.envpol.2018.08.026>.

Zong, Z., Tan, Y., Wang, X., Tian, C., Li, J., Fang, Y., Chen, Y., Cui, S., Zhang, G., 2020. Dual-modelling-based source apportionment of  $\text{NO}_x$  in five Chinese megacities: providing the isotopic footprint from 2013 to 2014. *Environ Int* 137, 105592. <https://doi.org/10.1016/j.envint.2020.105592>.

Zong, Z., Tian, C., Sun, Z., Tan, Y., Shi, Y., Liu, X., Li, J., Fang, Y., Chen, Y., Ma, Y., Gao, H., Zhang, G., Wang, T., 2022. Long - term evolution of particulate nitrate pollution in North China: isotopic evidence from 10 offshore cruises in the Bohai Sea from 2014 to 2019. *Journal of Geophysical Research: Atmospheres* 127, e2022JD036567. <https://doi.org/10.1029/2022JD036567>.

Zong, Z., Wang, X., Tian, C., Chen, Y., Fang, Y., Zhang, F., Li, C., Sun, J., Li, J., Zhang, G., 2017. First assessment of  $\text{NO}_x$  sources at a regional background site in North China using isotopic analysis linked with modeling. *Environ Sci Technol* 51 (11), 5923-5931. <https://doi.org/10.1021/acs.est.6b06316>

## Technical points:

45 : Do you mean “adsorbed” here rather than “absorbed”? The use of “onto” makes it seem like you might be referring to adsorption rather than absorption.

**Reply:** Thank you for the suggestion. We have replaced “absorbed” with "adsorbed" in line 47.

65: This paragraph is excessively long and should be broken up by paragraph breaks to aid readability.

**Reply:** Thank you for the suggestion. We have restructured the paragraph to improve the readability by splitting it into two separate sections, which can now be found in lines 59–80 and lines 105–124 of the revised manuscript.

133: I think the use of a colon (:) here is more appropriate than “i.e.”

**Reply:** Thank you for your suggestion. We have revised the text by replacing "i.e." with a colon (:) to improve clarity, as recommended. This change has been made in line 176.

182: Perhaps refer to it as the “bacterial denitrifier method” just to be explicitly clear.

**Reply:** You are correct. This method employs the *Pseudomonas aureofaciens* (ATCC13985) strain to completely reduce  $\text{NO}_3^-$  to  $\text{N}_2\text{O}$  gas for isotope analysis. We have revised the text accordingly, and the change can be found in lines 206–209.

Revised sentence: The  $\delta^{18}\text{O}$  and  $\delta^{15}\text{N}$  values of  $\text{NO}_3^-$  in the TSP samples were determined via the bacterial denitrifier method (Casciotti et al., 2002; Sigman et al., 2001) with the Gasbench-IRMS system (Delta V model, Thermo Scientific).

Figure 3: The star symbol is used four times in total, but I’m guess you are only referring to the two times it is used for the R value? Perhaps just state in the caption that the R value is significant at a  $p < 0.05$  level.

**Reply:** Thank you for your suggestion. We have revised the figure caption to clarify the use of the star symbol. The figure now states that the \* indicates R values significant at the  $p < 0.05$  level. This change can be found in the caption of Figure 3 in the revised manuscript.

Figure 4: Maybe consider putting a larger label on the vertical left side for  $\text{PM}_{2.5}$ ,  $\text{NO}_3^-$ ,  $\text{NH}_4^+$ , and  $\text{SO}_4^{2-}$  to make it more clear what each row of data is representing.

**Reply:** Thank you for your suggestion. We have updated Figure 4 by adding larger labels on the left side to clearly indicate  $\text{PM}_{2.5}$ ,  $\text{NO}_3^-$ ,  $\text{NH}_4^+$ , and  $\text{SO}_4^{2-}$  for each row of data. This revision can be found in Figure 4 of the revised manuscript.



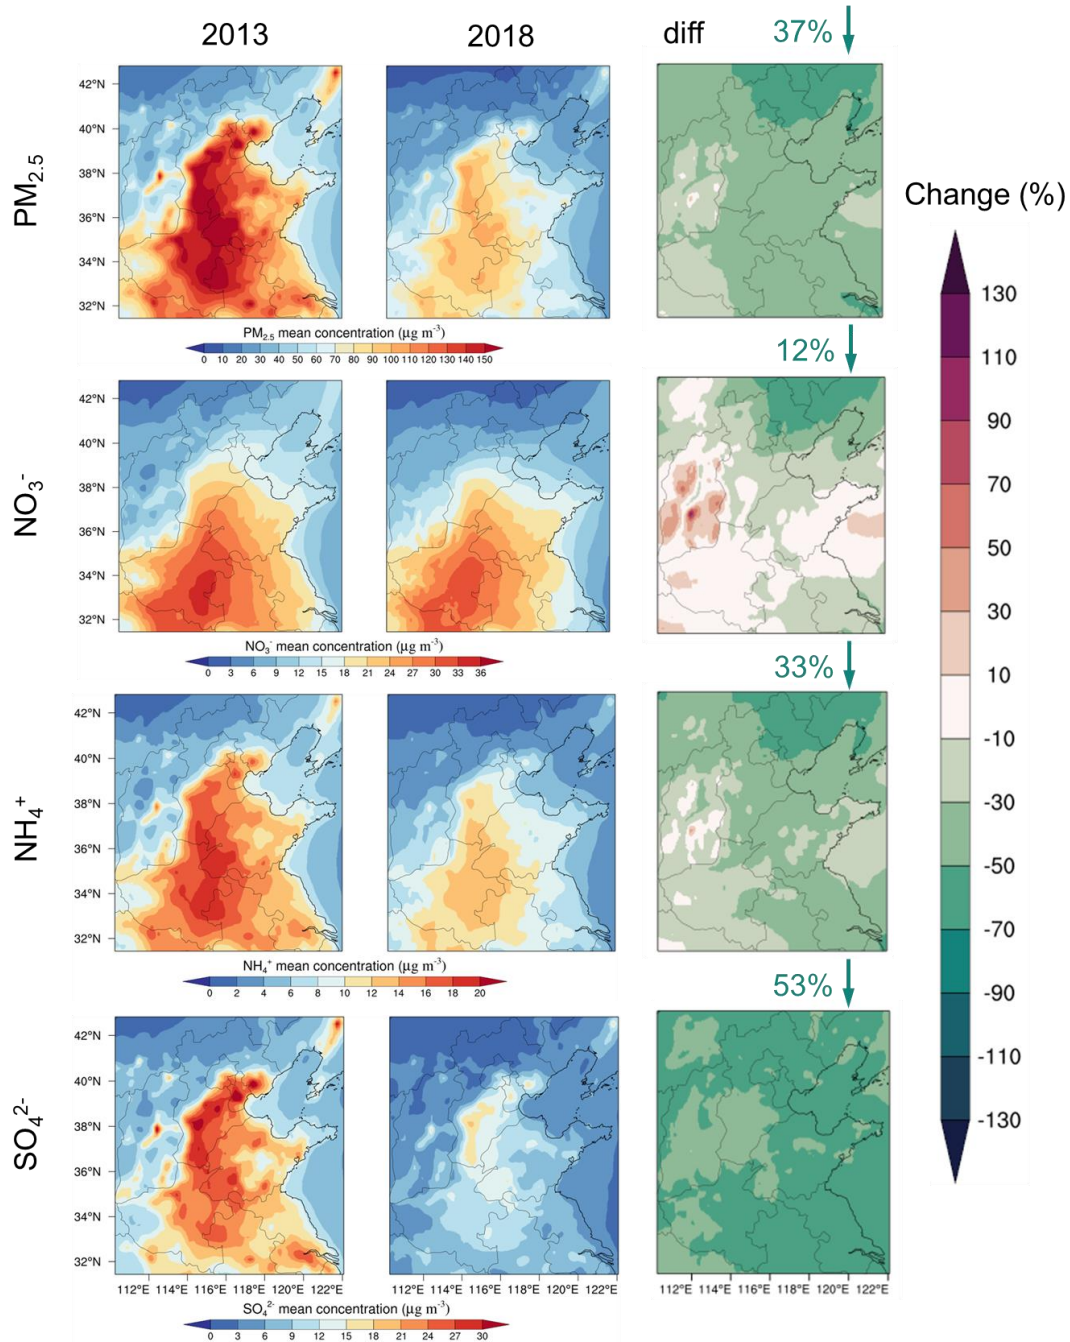

Figure 4 Spatial distribution and changes in  $PM_{2.5}$  and its components in the NCP during the winters of 2013 and 2018. The up arrows indicate increases, and the down arrows indicate decreases.

Fig 5: Period missing at end of caption. This diverging color scheme is also a bit confusing as used here, because it is the same color scheme used in Fig 4 to show representative change (pos = red, neg = green), but here it is a unidirectional scale. I'd recommend a different color scheme to avoid confusion or unintentional misleading.

**Reply:** We are sorry for the confusion. We have revised Figure 5 by updating the color scheme to avoid confusion with Figure 4 and to better align it with its unidirectional scale. Additionally, we have added a period at the end of the title. This revision can be found in Figure 5 of the revised manuscript.



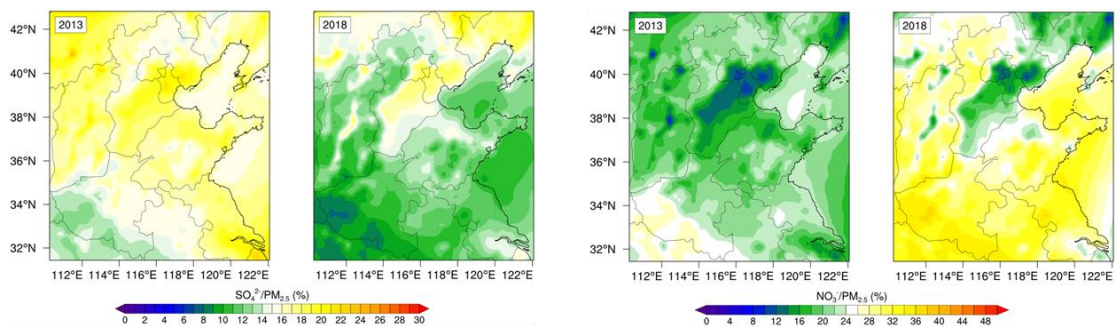

Figure 5 Spatial distributions of the nitrate and sulfate proportions in  $PM_{2.5}$  in the NCP region during the winters of 2013 and 2018.

Figure 6: Humans are pretty bad at estimating angular areas. You might consider alternatives such as treemaps or waffle charts. Not required from me, but just put here for consideration. This is also a pretty simple figure, and since you have so many figures, you might consider merging it with another or whether it is necessary.

**Reply:** Thank you for your valuable suggestion. We believe that alternative visualizations, such as treemaps or waffle charts, can indeed improve the clarity and readability of the figure. After further review, we find that Figure 6 contributes relatively little to the overall manuscript; therefore, we have removed it.

Fig 9: The color choices could be changed to improve the visual story. For example, the  $OH + NO_2$  on both sides would ideally both be blue, or shades of blue. And  $hetN_2O_5$  both be orange or shades of orange. That would make it more clear that we should be directly relating them.

**Reply:** Thank you for your insightful suggestion. We have revised the figure according to suggestion. This revision can be found in Figure 9 of the revised manuscript.

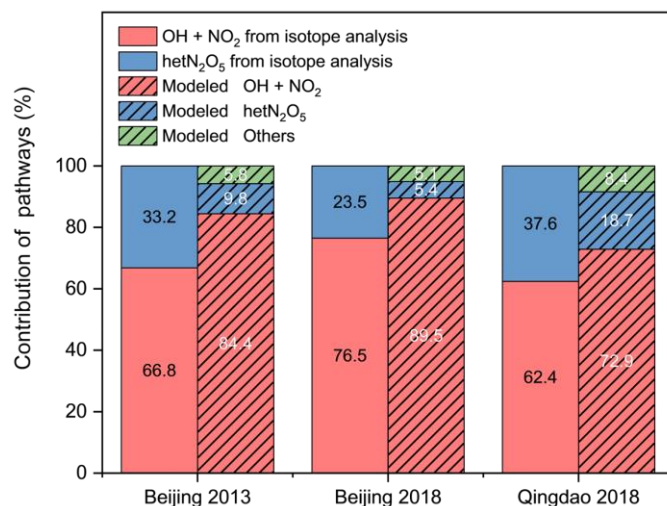

Figure 9 Comparison of the contributions of the atmospheric  $NO_3^-$  formation pathways based on the dual-isotope results and model simulations for Beijing in 2013 and 2018 and for Qingdao in 2018.

Fig 10: The legend for the dot looks like it is just connected to OH Pathway, and it should be labelled as  $\text{NO}_3^-$  concentration or  $[\text{NO}_3^-]$  not just  $\text{NO}_3^-$ . Missing a period at end of caption. Subfigures should probably either be all in one column OR the 2018/19 Qingdao be under the 2018 Beijing chart.

**Reply:** Thank you for your valuable feedback. We have updated the legend to clearly label the dots as " $\text{NO}_3^-$  concentration" and added a period at the end of the caption. Additionally, we have adjusted the layout by placing the 2018/19 Qingdao chart directly below the 2018 Beijing chart, ensuring a more logical and visually consistent arrangement. This revision can be found in Figure 8 of the revised manuscript.

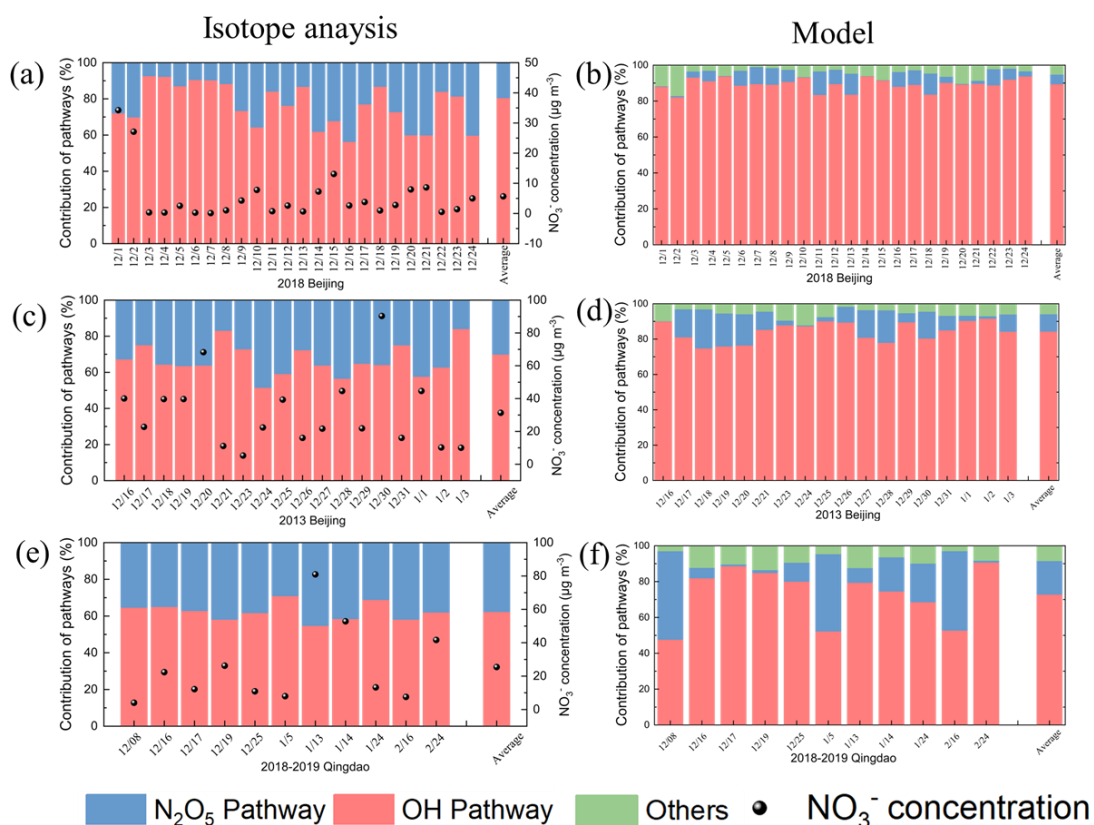

Figure 8 Time series of the contributions of the atmospheric  $\text{NO}_3^-$  formation pathways: (a, b) Beijing 2018, (c, d) Beijing 2013, and (e, f) Qingdao 2018, based on (a, c, e) dual-isotope analysis and (b, d, f) model simulations.

432: There is a comma splice in this sentence.

**Reply:** We have revised the sentence to correct this issue. In addition, we have checked the manuscript carefully to ensure proper sentence structure and improve readability in lines 518–520 of the revised version. We appreciate your careful review and valuable feedback.

Revised sentence: This hypothesis could be verified from an emission perspective. The total ammonia emissions in China increased from 9.64 to 9.75 Tg from 2013–2015 and then gradually decreased to 9.12 Tg by 2018 (Liao et al., 2022).

Fig 13: The scaling seems poor or wrong in the difference map. The HONO concentrations only cover  $<2$  ppb but the scaling on the difference is  $\pm 50$ .

**Reply:** We apologize for the confusion. The differential scale represents the percentage change in HONO concentration in 2018 relative to 2013. For clarity, we have adjusted the scale to  $\pm 100\%$  to more accurately depict the range of HONO concentration variations. This revision has been implemented in Figure 11 of the revised manuscript.

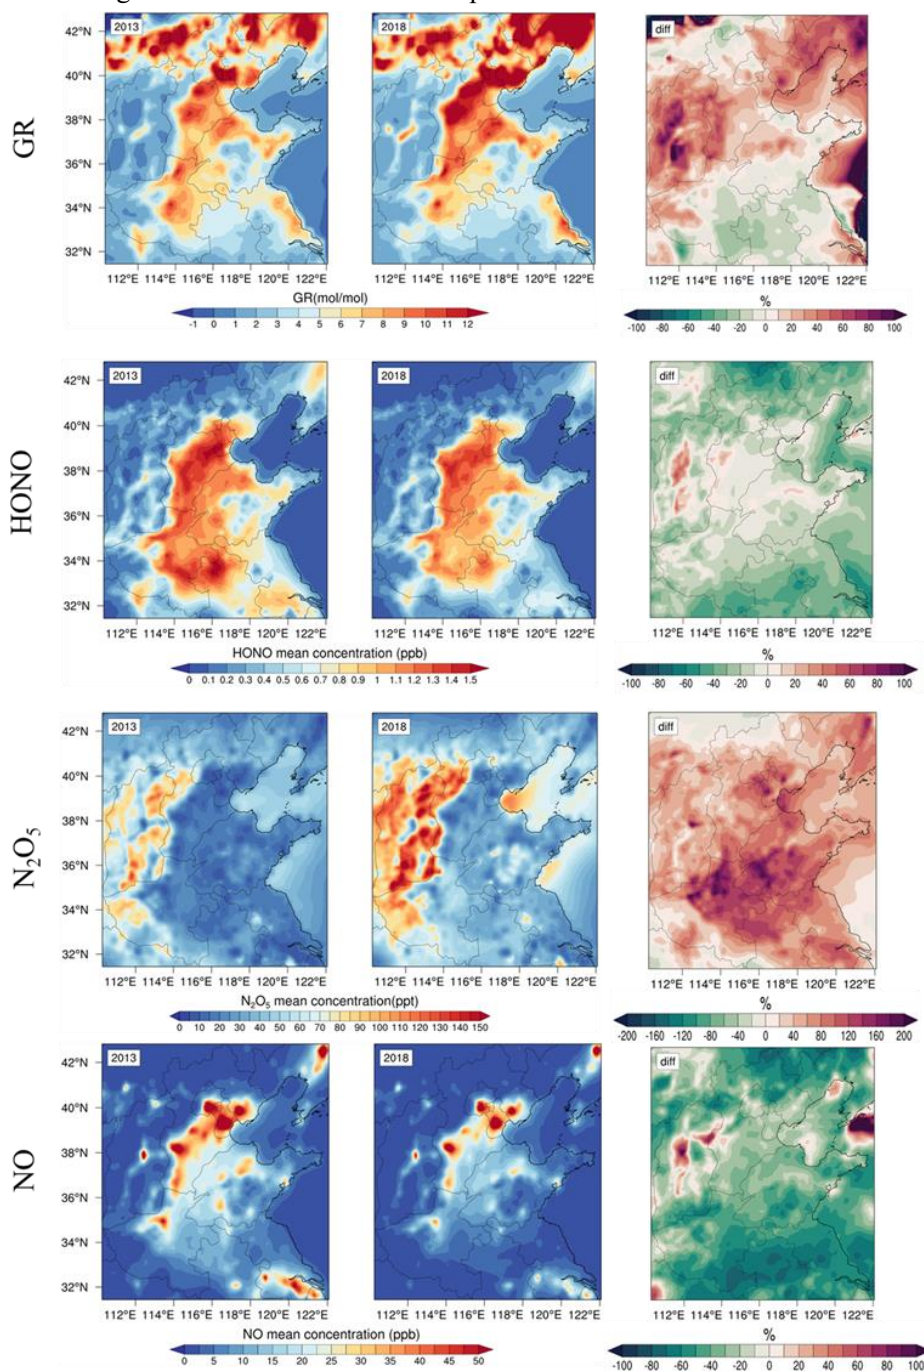

Figure 11 Spatial distributions and interannual variations in the GR, HONO,  $N_2O_5$ , and  $NO_x$  concentrations over the North China Plain during the winters of 2013 and 2018. The percentage changes (diff) represent the relative differences between 2018 and 2013.

Supporting Information

# **Enhanced Atmospheric Oxidation and Particle Reductions Driving Changes to Nitrate Formation Mechanisms across Coastal and Inland Regions of North China**

Zhenze Liu<sup>1,2</sup>, Jianhua Qi<sup>1,2</sup>, Yuanzhe Ni<sup>1</sup>, Likun Xue<sup>3</sup>, Xiaohuan Liu<sup>1,2</sup>

<sup>1</sup> Key Laboratory of Marine Environment and Ecology, Ministry of Education, Ocean University of China, Qingdao 266100, China

<sup>2</sup> Laboratory for Marine Ecology and Environmental Science, Qingdao Marine Science and Technology Center, Qingdao 266237, China

<sup>3</sup> Environment Research Institute, Shandong University, Qingdao, Shandong, 266237, China

*Correspondence to:* Jianhua Qi ([qjianhua@ouc.edu.cn](mailto:qjianhua@ouc.edu.cn)), Xiaohuan Liu ([liuxh1983@ouc.edu.cn](mailto:liuxh1983@ouc.edu.cn))

## Text S1

Our isotope blank measurements followed the same procedure as the sample isotope analysis. Specifically, in the sample measurements, after purging with high-purity nitrogen, 20 nmol of nitrogen was added to the headspace vial containing the *Pseudomonas aureofaciens* (ATCC13985) strain. For the blank measurements, no sample was added, and after 24 hours, 10 M NaOH was directly injected to quench the reaction before the analysis. The peak area in the chromatogram represents the absolute amount of N<sub>2</sub>O reduced by the strain, and the  $\delta^{15}\text{N}$  and  $\delta^{18}\text{O}$  values correspond to the  $\delta^{15}\text{N}$  and  $\delta^{18}\text{O}$  values of the sample. The peak area for the samples was around 10, while the peak areas for the two blank measurements were only 0.371 and 0.336, indicating an influence on the isotope values of less than 5%, which is negligible and thus not considered.

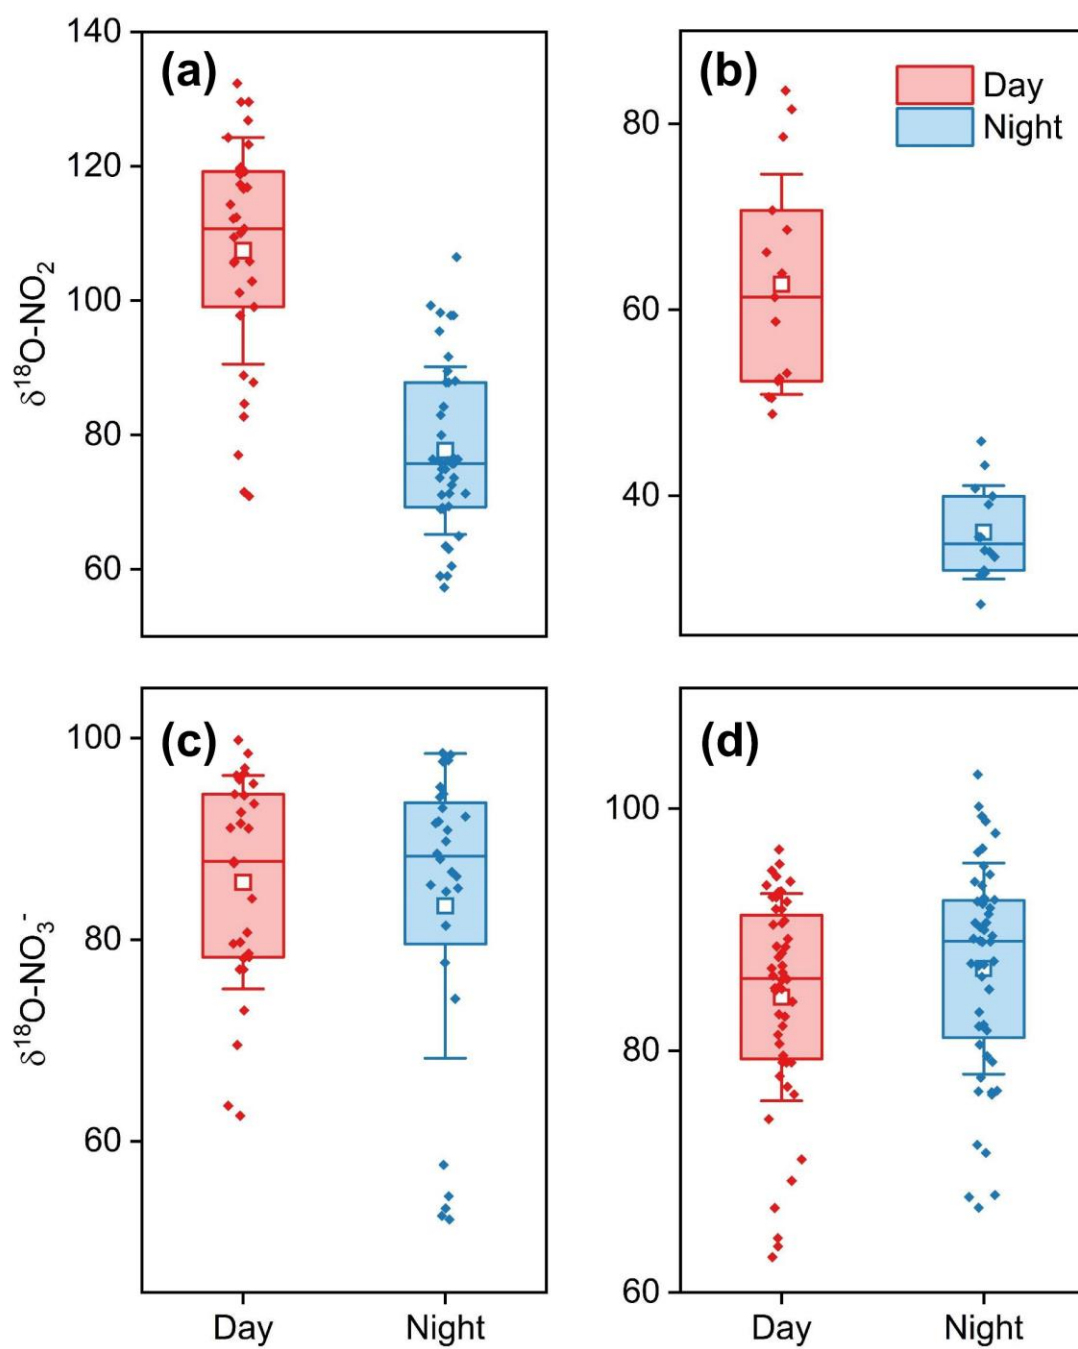

**Figure S1** The diurnal values of atmospheric  $\delta^{18}\text{O-NO}_2$  in Hefei winter (Zhang et al., 2025) (a) and in Nanchang summer (Cao, 2022) (b), and  $\delta^{18}\text{O-NO}_3^-$  in Tianjin winter (Feng et al., 2020) (c) and in Nanjing winter (Zhang et al., 2022) (d).

## Text S2

In most studies, the tropospheric  $\delta^{15}\text{N-NO}_x$  was often assumed as 0‰ following Walters and Michalski (2016), Luo et al. (2023) and Deng et al. (2024). In addition, the tropospheric  $\delta^{18}\text{O-H}_2\text{O}_{(g)}$  in Beijing in winter was determined as -27.9‰ in Wen et al. (2010), and in Qingdao, it was determined as -18.6‰ in Wang et al. (2022). The tropospheric  $\delta^{18}\text{O-NO}_x$  ranged from 112‰ to 122‰ (Michalski et al., 2014; Walters and Michalski, 2016). The  $f_{\text{NO}_2}$  values in Beijing and Qingdao were 0.655 (Luo et al., 2023) and 0.786 (Lian et al., 2022) in winter, respectively.

$$\begin{aligned}\delta^{15}\text{N} - \text{NO}_3^- &= \gamma \times [\delta^{15}\text{N} - \text{NO}_3^-]_{\text{OH}} + (1 - \gamma) \times [\delta^{15}\text{N} - \text{NO}_3^-]_{\text{N}_2\text{O}_5} \\ &= \gamma \times [\delta^{15}\text{N} - \text{HNO}_3]_{\text{OH}} + (1 - \gamma) \times [\delta^{15}\text{N} - \text{HNO}_3]_{\text{N}_2\text{O}_5}\end{aligned}\quad (\text{S1})$$

$$\begin{aligned}\delta^{18}\text{O} - \text{NO}_3^- &= \gamma \times [\delta^{18}\text{O} - \text{NO}_3^-]_{\text{OH}} + (1 - \gamma) \times [\delta^{18}\text{O} - \text{NO}_3^-]_{\text{N}_2\text{O}_5} \\ &= \gamma \times [\delta^{18}\text{O} - \text{HNO}_3]_{\text{OH}} + (1 - \gamma) \times [\delta^{18}\text{O} - \text{HNO}_3]_{\text{N}_2\text{O}_5}\end{aligned}\quad (\text{S2})$$

$$\begin{aligned}[\delta^{15}\text{N} - \text{HNO}_3]_{\text{OH}} &= \delta^{15}\text{N} - \text{NO}_2 \\ &= 1000 \times \left[ \frac{(^{15}\alpha_{\text{NO}_2/\text{NO}} - 1)(1 - f_{\text{NO}_2})}{(1 - f_{\text{NO}_2}) + (^{15}\alpha_{\text{NO}_2/\text{NO}} \times f_{\text{NO}_2})} \right] + \delta^{15}\text{N} - \text{NO}_x\end{aligned}\quad (\text{S3})$$

$$[\delta^{15}\text{N} - \text{HNO}_3]_{\text{N}_2\text{O}_5} = 1000 \times (^{15}\alpha_{\text{N}_2\text{O}_5/\text{NO}_2} - 1) + \delta^{15}\text{N} - \text{NO}_x \quad (\text{S4})$$

$$\begin{aligned}[\delta^{18}\text{O} - \text{HNO}_3]_{\text{OH}} &= \frac{2}{3} \times [\delta^{18}\text{O} - \text{NO}_2]_{\text{OH}} + \frac{1}{3} \times [\delta^{18}\text{O} - \text{OH}]_{\text{OH}} \\ &= \frac{2}{3} \times \left[ \frac{1000 \times (^{18}\alpha_{\text{NO}_2/\text{NO}} - 1) \times (1 - f_{\text{NO}_2})}{(1 - f_{\text{NO}_2}) + (^{18}\alpha_{\text{NO}_2/\text{NO}} \times f_{\text{NO}_2})} + [\delta^{18}\text{O} - \text{NO}_x] \right] \\ &\quad + \frac{1}{3} \times \left[ (\delta^{18}\text{O} - \text{H}_2\text{O}_{(g)}) + 1000 \times (^{18}\alpha_{\text{OH}/\text{H}_2\text{O}_{(g)}} - 1) \right]\end{aligned}\quad (\text{S5})$$

$$[\delta^{18}\text{O} - \text{HNO}_3]_{\text{N}_2\text{O}_5} = \delta^{18}\text{O} - \text{NO}_2 + 1000 \times (^{18}\alpha_{\text{N}_2\text{O}_5/\text{NO}_2} - 1) \quad (\text{S6})$$

$$1000(^m\alpha_{x/y} - 1) = \frac{A}{T^4} \times 10^{10} + \frac{B}{T^3} \times 10^8 + \frac{C}{T^2} \times 10^6 + \frac{D}{T} \times 10^4 \quad (\text{S7})$$



**Table S1 Values of  $\delta^{18}\text{O}$  from atmospheric components**

| Components                                 | Values (‰)          | References                                                                                                                |
|--------------------------------------------|---------------------|---------------------------------------------------------------------------------------------------------------------------|
| $\text{O}_3$                               | From 80 to 130      | Michalski et al., 2011                                                                                                    |
| $\text{O}_2$                               | 23.5                | Kroopnick and Craig; 1972                                                                                                 |
| $\text{H}_2\text{O}$ (g) in Beijing winter | -27.9               | Wen et al., 2010                                                                                                          |
| $\text{H}_2\text{O}$ (g) in Qingdao winter | -18.6               | Wang et al., 2022                                                                                                         |
| $\cdot\text{OH}$ in Beijing winter         | From -72.4 to -64.9 | $\delta^{18}\text{O}\text{-OH} = \delta^{18}\text{O}\text{-H}_2\text{O}_{(\text{g})} + 1000(^{18}\alpha_{\text{XY}} - 1)$ |
| $\cdot\text{OH}$ in Qingdao winter         | From -61.2 to -57.8 | (Walters and Michalski, 2016)                                                                                             |

**Table S2  $^{15}\alpha_{A/B}$  and  $^{18}\alpha_{A/B}$  regression coefficients as a function of the temperature (150 K  $\leq$  T  $\leq$  450 K) (Walters and Michalski, 2015, 2016)**

|                     |                                                | A        | B       | C       | D        |
|---------------------|------------------------------------------------|----------|---------|---------|----------|
| $^{15}\alpha_{A/B}$ | N <sub>2</sub> O <sub>5</sub> /NO <sub>2</sub> | 0.69398  | -1.9859 | 2.3876  | 0.16308  |
|                     | NO <sub>2</sub> /NO                            | 3.8834   | -7.7299 | 6.0101  | -0.17928 |
| $^{18}\alpha_{A/B}$ | NO/NO <sub>2</sub>                             | -0.04129 | 1.1605  | -1.8829 | 0.74723  |
|                     | ·OH/H <sub>2</sub> O <sub>(g)</sub>            | 2.1137   | -3.8026 | 2.5653  | 0.5941   |
|                     | N <sub>2</sub> O <sub>5</sub> /NO <sub>2</sub> | -0.54136 | 0.13073 | 1.2477  | -0.1272  |

**Table S3 Equations for calculating the statistical evaluation indices**

| Statistical index              | Formula                                                                                                                                                                                                                                                                                  |
|--------------------------------|------------------------------------------------------------------------------------------------------------------------------------------------------------------------------------------------------------------------------------------------------------------------------------------|
| 1. Mean Bias                   | $MB = \frac{1}{N} \sum_1^N (Sim - Obs)$                                                                                                                                                                                                                                                  |
| 2. Root Mean Square Error      | $RMSE = \sqrt{\frac{1}{N} \sum_1^N (Sim - Obs)^2}$                                                                                                                                                                                                                                       |
| 3. Index of agreement, IOA     | $IOA = 1 - \frac{\sum_{i=1}^N (Sim - Obs)^2}{\sum_{i=1}^N ( Sim - Obs  +  Obs - \overline{Obs} )^2}$                                                                                                                                                                                     |
| 4. Normalized Mean Bias        | $NMB = \frac{1}{N} \sum_1^N \left( \frac{Sim - Obs}{Obs} \right)$                                                                                                                                                                                                                        |
| 5. Normalized Mean Error       | $NME = \frac{1}{N} \sum_1^N \left  \frac{Sim - Obs}{Obs} \right $                                                                                                                                                                                                                        |
| 6. Correlation coefficient (R) | $R = \frac{1}{N} \sum_{i=1}^N \left[ \frac{(Sim - \overline{Sim})(Obs - \overline{Obs})}{S_p S_o} \right]$ $S_p = \left[ \frac{1}{N} \sum_{i=1}^N (Sim - \overline{Sim})^2 \right]^{\frac{1}{2}}$ $S_o = \left[ \frac{1}{N} \sum_{i=1}^N (Obs - \overline{Obs})^2 \right]^{\frac{1}{2}}$ |

**Table S4 Sources of nitrate observation data for the winter of 2013 and the winter of 2018 in the NCP**

| City         | Winter, 2013        | Winter, 2018       |
|--------------|---------------------|--------------------|
| Beijing      | Song et al. (2019)  | Fan et al. (2020)  |
| Tianjin      | Yao et al. (2020)   | Observation        |
| Shijiazhuang | Wang et al. (2016)  | Zhou et al. (2020) |
| Jinan        | Cheng et al. (2021) | Observation        |
| Zhengzhou    | Wei et al. (2019)   | Dong et al. (2020) |
| Qingdao      | Observation         | Observation        |
| Yantai       | /                   | /                  |

The  $\text{NO}_3^-$  observation data collected during the winter of 2018 for Tianjin were sourced from direct observations by the group of Li Xiaodong at Tianjin University (sampling site: Building 19 rooftop, Tianjin University; coordinates: 39.11°N, 117.16°E). The  $\text{NO}_3^-$  observation data collected during the winter of 2018 in Jinan were sourced from observations by the group of Xue Likun at Shandong University (sampling site: Jinan City Environmental Monitoring Station; coordinates: 36.66°N, 117.05°E). For Qingdao,  $\text{NO}_3^-$  observation data for both the winter of 2018 and the winter of 2013 were derived from our own observations.

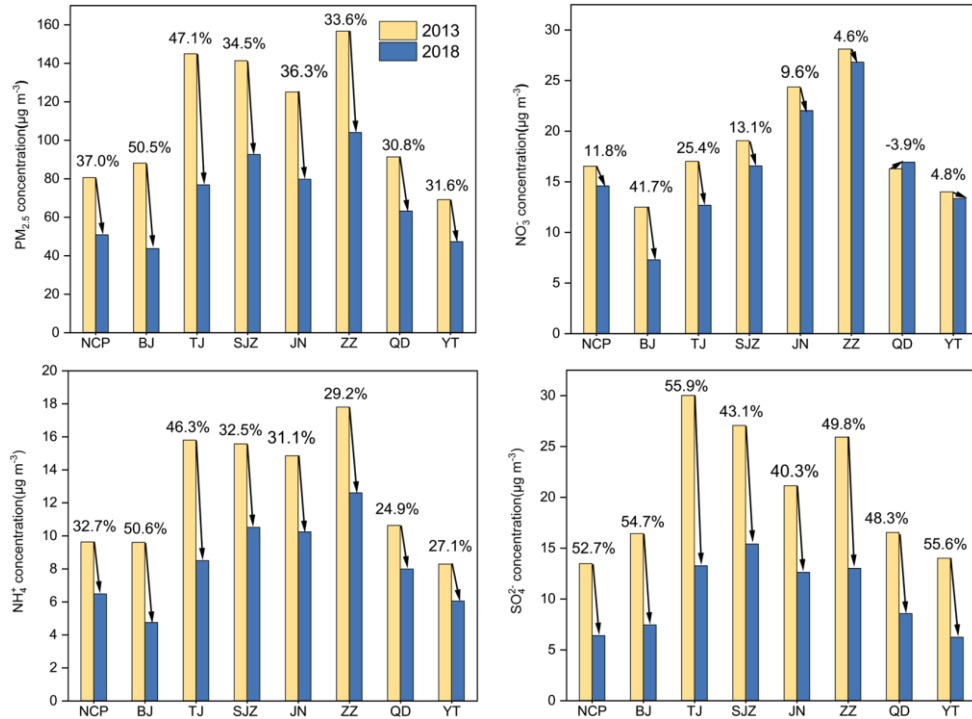

**Figure S2 Concentrations of PM<sub>2.5</sub> and its components in seven major cities in the NCP region during the winters of 2013 and 2018**

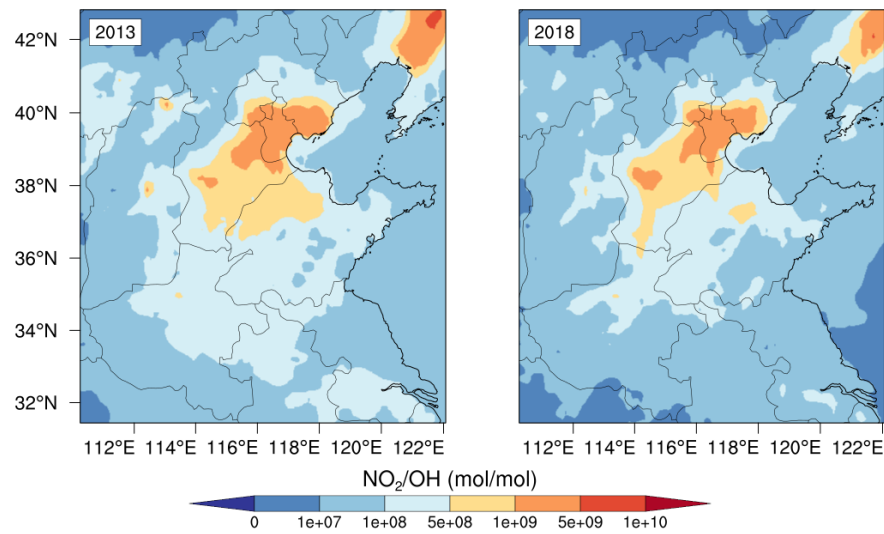

**Figure S3 Spatial distribution of the NO<sub>2</sub>/OH molar ratio in the NCP region during the winters of 2013 and 2018**

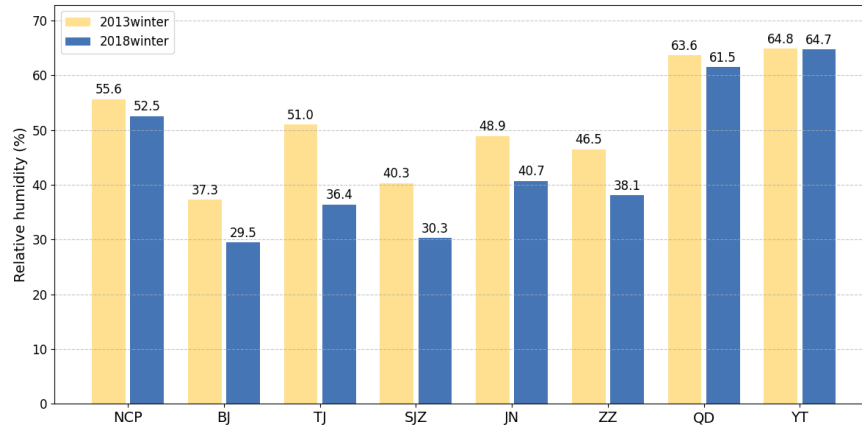

**Figure S4 Relative humidity in the NCP and seven major cities (2013, 2018)**

## Reference

- Cheng, M., Tang, G., Lv, B., Li, X., Wu, X., Wang, Y., and Wang, Y.: Source apportionment of PM<sub>2.5</sub> and visibility in Jinan, China, *Journal of Environmental Sciences*, 102, 207-215, doi:10.1016/j.jes.2020.09.012, 2021.
- Deng, M., Wang, C., Yang, C., Li, X., and Cheng, H.: Nitrogen and oxygen isotope characteristics, formation mechanism, and source apportionment of nitrate aerosols in Wuhan, Central China, *Science of The Total Environment*, 921, 170715, doi:10.1016/j.scitotenv.2024.170715, 2024.
- Dong, Z., Su, F., Zhang, Z., and Wang, S.: Observation of chemical components of PM<sub>2.5</sub> and secondary inorganic aerosol formation during haze and sandy haze days in Zhengzhou, China, *J Journal of Environmental Sciences*, 88, 316-325, doi:10.1016/j.jes.2019.09.016, 2020.
- Fan, M.-Y., Zhang, Y.-L., Lin, Y.-C., Cao, F., Zhao, Z.-Y., Sun, Y., Qiu, Y., Fu, P., and Wang, Y.: Changes of Emission Sources to Nitrate Aerosols in Beijing After the Clean Air Actions: Evidence From Dual Isotope Compositions, *Journal of Geophysical Research: Atmospheres*, 125, e2019JD031998, doi:10.1029/2019JD031998, 2020.
- Lian, C., Wang, W., Chen, Y., Zhang, Y., Zhang, J., Liu, Y., Fan, X., Li, C., Zhan, J., Lin, Z., Hua, C., Zhang, W., Liu, M., Li, J., Wang, X., An, J., and Ge, M.: Long-term winter observation of nitrous acid in the urban area of Beijing, *Journal of Environmental Sciences*, 114, 334-342, doi:10.1016/j.jes.2021.09.010, 2022.
- Luo, L., Wu, S., Zhang, R., Wu, Y., Li, J., and Kao, S.-j.: What controls aerosol  $\delta^{15}\text{N}-\text{NO}_3^-$ ? NO<sub>x</sub> emission sources vs. nitrogen isotope fractionation, *Science of The Total Environment*, 871, 162185, doi:10.1016/j.scitotenv.2023.162185, 2023.
- Michalski, G., Bhattacharya, S. K., and Girsch, G.: NO<sub>x</sub> cycle and the tropospheric ozone isotope anomaly: an experimental investigation, *Atmos. Chem. Phys.*, 14, 4935-4953, doi:10.5194/acp-14-4935-2014, 2014.
- Song, W., Wang, Y.-L., Yang, W., Sun, X.-C., Tong, Y.-D., Wang, X.-M., Liu, C.-Q., Bai, Z.-P., and Liu, X.-Y.: Isotopic evaluation on relative contributions of major NO<sub>x</sub> sources to nitrate of PM<sub>2.5</sub> in Beijing, *Environmental Pollution*, 248, 183-190, doi:10.1016/j.envpol.2019.01.081, 2019.
- Walters, W. W. and Michalski, G.: Theoretical calculation of nitrogen isotope equilibrium exchange fractionation factors for various NO<sub>y</sub> molecules, *Geochimica et Cosmochimica Acta*, 164, 284-297, doi:10.1016/j.gca.2015.05.029, 2015.

Walters, W. W. and Michalski, G.: Theoretical calculation of oxygen equilibrium isotope fractionation factors involving various NO<sub>y</sub> molecules, OH, and H<sub>2</sub>O and its implications for isotope variations in atmospheric nitrate, *Geochimica et Cosmochimica Acta*, 191, 89-101, doi:10.1016/j.gca.2016.06.039, 2016.

Wang, X., Zhou, Y., Cheng, S., and Wang, G.: Characterization and regional transmission impact of water-soluble ions in PM<sub>2.5</sub> during winter in typical cities, *China Environmental Science*, 36, 2289-2296, 2016.

Wang, Y., Cui, B.-l., Li, D.-s., Wang, Y.-x., Yu, W.-x., and Zong, H.-h.: Stable Isotopes Reveal Water Vapor Sources of Precipitation over the Jiaolai Plain, Shandong Peninsula, China, *Asia-Pacific Journal of Atmospheric Sciences*, 58, 227-241, doi:10.1007/s13143-021-00253-2, 2022.

Wei, X., Gao, m., and Tong, j.: Characterization of water-soluble ions of PM<sub>2.5</sub> in Zhengzhou, *Chinese journal of quantum*, 36, 495-499, 2019.

Wen, X.-F., Zhang, S.-C., Sun, X.-M., Yu, G.-R., and Lee, X.: Water vapor and precipitation isotope ratios in Beijing, China, *Journal of Geophysical Research: Atmospheres*, 115, doi:10.1029/2009JD012408, 2010.

Yao, Q., Liu, Z., Han, S., Cai, Z., Liu, J., Hao, T., Liu, J., Huang, X., and Wang, Y.: Seasonal variation and secondary formation of size-segregated aerosol water-soluble inorganic ions in a coast megacity of North China Plain, *Environmental Science and Pollution Research*, 27, 26750-26762, doi:10.1007/s11356-020-09052-0, 2020.

Zhou, J., Duan, J., Wang, J., Liu, H., LI, M., and Jin, W.: Analysis of pollution characteristics and sources of PM<sub>2.5</sub> during heavy pollution in Shijiazhuang city around New Year's Day 2019, *Environmental Science*, 41, 39-49, doi:10.13227/j.hjx.201906085, 2020.

Cao, L. Nitrogen and oxygen isotope tracing of urban atmospheric nitrate sources and atmospheric processes—taking Beijing and Nanchang as examples. Dissertation for master's degree of East China University of Technology.

Feng, X., Li, Q., Tao, Y., Ding, S., Chen, Y., and Li, X.: Impact of Coal Replacing Project on atmospheric fine aerosol nitrate loading and formation pathways in urban Tianjin: Insights from chemical composition and <sup>15</sup>N and <sup>18</sup>O isotope ratios, *Sci. Total Environ.*, 708, 134797, doi:10.1016/j.scitotenv.2019.134797, 2020.

Zhang, Y., Zhang, W., Fan, M., Li, J., Fang, H., Cao, F., Lin, Y., Wilkins, B. P., Liu, X., Bao, M., Hong, Y., and Michalski, G.: A diurnal story of  $\Delta^{17}\text{O}(\text{NO}_3^-)$  in urban Nanjing and its implication for nitrate

aerosol formation, *npj Climate and Atmospheric Science*, 5, 10.1038/s41612-022-00273-3, 2022.

Zhang, Z., Zhou, T., Jiang, Z., Ma, T., Su, G., Ruan, X., Wu, Y., Cao, Y., Wang, X., Liu, Z., Li, W., Zhang, H., Lin, M., Liu, P., and Geng, L.: High-Resolution Measurements of Multi-Isotopic Signatures ( $\delta^{15}\text{N}$ ,  $\delta^{18}\text{O}$ , and  $\Delta^{17}\text{O}$ ) of Winter  $\text{NO}_2$  in a Megacity in Central China, *Environ. Sci. Technol.*, 59, 3634-3644, 10.1021/acs.est.4c07724, 2025.

Kroopnick, P., and Craig, H.: Atmospheric Oxygen: Isotopic Composition and Solubility Fractionation, *Science*, 175, 54-55, 10.1126/science.175.4017.54, 1972.

Michalski, G., Bhattacharya, S. K., and Girsch, G.:  $\text{NO}_x$  cycle and the tropospheric ozone isotope anomaly: an experimental investigation, *Atmos. Chem. Phys.*, 14, 4935-4953, 10.5194/acp-14-4935-2014, 2014.

Michalski, G., Bhattacharya, S. K., DF Mase., 2011. Oxygen isotope dynamics of atmospheric nitrate and its precursor molecules. Springer Berlin Heidelberg.

Walters, W. W., and Michalski, G.: Theoretical calculation of oxygen equilibrium isotope fractionation factors involving various  $\text{NO}$  molecules,  $\text{OH}$ , and  $\text{H}_2\text{O}$  and its implications for isotope variations in atmospheric nitrate, *Geochim. Cosmochim. Ac.*, 191, 89-101, 10.1016/j.gca.2016.06.039, 2016.
